# Supplementary material for: Trends in Self-Reported Adherence to Healthy Lifestyle Behaviors Among US Adults, 1999 to March 2020
Source: PubMed Central journal article supplement (PMC10349344; doi:10.1001/jamanetworkopen.2023.23584), 2023-07-14
Supplement: jamanetwopen-e2323584-s001.pdf [file jamanetwopen-e2323584-s001.pdf]

## Supplementary Online Content

Li Y, Xia PF, Geng TT, et al. Trends in self-reported adherence to healthy lifestyle behaviors among US adults, 1999 to March 2020. *JAMA Netw Open*. 2023;6(7):e2323584. doi:10.1001/jamanetworkopen.2023.23584

**eTable 1.** Healthy Eating Index–2015 Components, Component Points, and Scoring Standards

**eTable 2.** Number of Participants According to the Number of Healthy Lifestyle Factors Among US Adults 20 Years or Older, 1999 to March 2020

**eTable 3.** Crude Trends in Estimated Prevalence of Healthy Eating Index–2015 Among US Adults 20 Years or Older, 2003 to March 2020

**eTable 4.** Crude Trends in Estimated Prevalence of Physical Activity Among US Adults 20 Years or Older, 1999 to 2006 and 2007 to March 2020

**eTable 5.** Adjusted Trends in Estimated Prevalence of Healthy Lifestyle Factors Among US Adults 20 Years or Older, 1999 to March 2020

**eTable 6.** Adjusted Trends in Estimated Prevalence of Healthy Lifestyle Among US Adults 20 Years or Older, 1999 to March 2020

**eTable 7.** Crude Trends in Estimated Prevalence of Healthy Lifestyle by Age Group, Sex, Race and Ethnicity, Educational Level, and Income, 1999 to March 2020

**eTable 8.** Crude Trends in Estimated Prevalence of Never Smoking by Age Group, Sex, Race and Ethnicity, Educational Level, and Income, 1999 to March 2020

**eTable 9.** Crude Trends in Estimated Prevalence of Moderate or Lighter Alcohol Consumption by Age Group, Sex, Race and Ethnicity, Educational Level, and Income, 1999 to March 2020

**eTable 10.** Crude Trends in Estimated Prevalence of Healthy Diet by Age Group, Sex, Race and Ethnicity, Educational Level, and Income, 1999 to March 2020

**eTable 11.** Crude Trends in Estimated Prevalence of Sufficient Physical Activity by Age Group, Sex, Race and Ethnicity, Educational Level, and Income, 1999 to 2006

**eTable 12.** Crude Trends in Estimated Prevalence of Sufficient Physical Activity by Age Group, Sex, Race and Ethnicity, Educational Level, and Income, 2007 to March 2020

**eTable 13.** Crude Trends in Estimated Prevalence of Healthy Weight by Age Group, Sex, Race and Ethnicity, Educational Level, and Income, 1999 to March 2020

This supplementary material has been provided by the authors to give readers additional information about their work.

**eTable 1. Healthy Eating Index–2015 Components, Component Points, and Scoring Standards<sup>a</sup>**

| Component                                 | Maximum points | Standard for maximum score     | Standard for minimum score of zero  |
|-------------------------------------------|----------------|--------------------------------|-------------------------------------|
| <b>Adequacy</b>                           |                |                                |                                     |
| Total Fruits <sup>b</sup>                 | 5              | ≥0.8 cup equiv. per 1,000 kcal | No Fruit                            |
| Whole Fruits <sup>c</sup>                 | 5              | ≥0.4 cup equiv. per 1,000 kcal | No Whole Fruit                      |
| Total Vegetables <sup>d</sup>             | 5              | ≥1.1 cup equiv. per 1,000 kcal | No Vegetables                       |
| Greens and Beans                          | 5              | ≥0.2 cup equiv. per 1,000 kcal | No Dark Green Vegetables or Legumes |
| Whole Grains                              | 10             | ≥1.5 oz equiv. per 1,000 kcal  | No Whole Grains                     |
| Dairy <sup>e</sup>                        | 10             | ≥1.3 cup equiv. per 1,000 kcal | No Dairy                            |
| Total Protein Foods <sup>f</sup>          | 5              | ≥2.5 oz equiv. per 1,000 kcal  | No Protein Foods                    |
| Seafood and Plant Proteins <sup>f,g</sup> | 5              | ≥0.8 oz equiv. per 1,000 kcal  | No Seafood or Plant Proteins        |
| Fatty Acids <sup>h</sup>                  | 10             | (PUFAs + MUFAs)/SFAs ≥2.5      | (PUFAs + MUFAs)/SFAs ≤1.2           |
| <b>Moderation</b>                         |                |                                |                                     |
| Refined Grains                            | 10             | ≤1.8 oz equiv. per 1,000 kcal  | ≥4.3 oz equiv. per 1,000 kcal       |
| Sodium                                    | 10             | ≤1.1 gram per 1,000 kcal       | ≥2.0 grams per 1,000 kcal           |
| Added Sugars                              | 10             | ≤6.5% of energy                | ≥26% of energy                      |
| Saturated Fats                            | 10             | ≤8% of energy                  | ≥16% of energy                      |

<sup>a</sup> Intakes between the minimum and maximum standards are scored proportionately.

<sup>b</sup> Includes 100% fruit juice.

<sup>c</sup> Includes all forms except juice.

<sup>d</sup> Includes legumes (beans and peas).

<sup>e</sup> Includes all milk products, such as fluid milk, yogurt, and cheese, and fortified soy beverages.

<sup>f</sup> Includes legumes (beans and peas).

<sup>g</sup> Includes seafood, nuts, seeds, soy products (other than beverages), and legumes (beans and peas).

<sup>h</sup> Ratio of poly- and monounsaturated fatty acids (PUFAs and MUFAs) to saturated fatty acids (SFAs).

**eTable 2.** Number of Participants According to the Number of Healthy Lifestyle Factors Among US Adults 20 Years or Older, 1999 to March 2020<sup>a</sup>

| <b>Number of healthy lifestyle factors</b> | <b>Number of participants</b> |
|--------------------------------------------|-------------------------------|
| <b>Zero to five</b>                        |                               |
| 1999-2000                                  | 3967                          |
| 2001-2002                                  | 4295                          |
| 2003-2004                                  | 4120                          |
| 2005-2006                                  | 4184                          |
| 2007-2008                                  | 5001                          |
| 2009-2010                                  | 5196                          |
| 2011-2012                                  | 4372                          |
| 2013-2014                                  | 4740                          |
| 2015-2016                                  | 4652                          |
| 2017-March 2020                            | 7325                          |
| <b>Five</b>                                |                               |
| 1999-2000                                  | 96                            |
| 2001-2002                                  | 123                           |
| 2003-2004                                  | 94                            |
| 2005-2006                                  | 112                           |
| 2007-2008                                  | 114                           |
| 2009-2010                                  | 150                           |
| 2011-2012                                  | 182                           |
| 2013-2014                                  | 212                           |
| 2015-2016                                  | 171                           |
| 2017-March 2020                            | 221                           |

<sup>a</sup> Healthy lifestyle factors included never smoking, non-heavy drinking ( $\leq 14$  drinks/week for men or  $\leq 7$  drinks/week for women), healthy diet (a Healthy Eating Index-2015 score  $\geq 60$ ), sufficient physical activity ( $\geq 150$  minutes/week moderate to vigorous intensity physical activity), normal weight (body mass index at 18.5–24.9 kg/m<sup>2</sup>).

**eTable 3.** Crude Trends in Estimated Prevalence of Healthy Eating Index–2015 Among US Adults 20 Years or Older, 2003 to March 2020

|                                        | Estimated prevalence of Healthy Eating Index-2015, % (95% CI) <sup>a</sup> |                         |                         |                         |                         |                         |                         |                              | P value for trend | Difference, 2017-March 2020 vs 2003-2004 (95% CI) <sup>b</sup> |
|----------------------------------------|----------------------------------------------------------------------------|-------------------------|-------------------------|-------------------------|-------------------------|-------------------------|-------------------------|------------------------------|-------------------|----------------------------------------------------------------|
|                                        | 2003-2004<br>(n = 3835)                                                    | 2005-2006<br>(n = 3790) | 2007-2008<br>(n = 4365) | 2009-2010<br>(n = 4583) | 2011-2012<br>(n = 3940) | 2013-2014<br>(n = 4235) | 2015-2016<br>(n = 3933) | 2017-March 2020<br>(n =6349) |                   |                                                                |
| <b>Healthy Eating Index-2015 score</b> |                                                                            |                         |                         |                         |                         |                         |                         |                              |                   |                                                                |
| <40                                    | 17.8<br>(15.4-20.3)                                                        | 15.5<br>(13.2-17.7)     | 16.2<br>(14.1-18.3)     | 13.7<br>(12.4-15.0)     | 13.6<br>(12.3-14.9)     | 15.1<br>(14.0-16.1)     | 16.3<br>(13.3-19.2)     | 17.6<br>(15.1-20.0)          | .60               | -0.3<br>(-3.7 to 3.2)                                          |
| 40-49.9                                | 29.3<br>(27.1-31.5)                                                        | 29.2<br>(27.1-31.2)     | 27.9<br>(24.3-31.4)     | 25.0<br>(23.2-26.8)     | 23.3<br>(20.7-25.9)     | 25.9<br>(23.8-28.0)     | 25.1<br>(22.4-27.8)     | 25.5<br>(23.1-27.9)          | .005              | -3.8<br>(-7.1 to -0.5)                                         |
| 50-59.9                                | 29.1<br>(27.6-30.6)                                                        | 27.6<br>(25.6-29.6)     | 26.2<br>(24.7-27.7)     | 29.1<br>(26.8-31.3)     | 28.0<br>(25.8-30.2)     | 24.5<br>(22.9-26.2)     | 26.3<br>(24.3-28.4)     | 27.4<br>(25.3-29.6)          | .18               | -1.6<br>(-4.3 to 1.0)                                          |
| ≥60                                    | 23.8<br>(20.8-26.8)                                                        | 27.8<br>(25.3-30.2)     | 29.7<br>(25.1-34.4)     | 32.2<br>(30.5-34.0)     | 35.1<br>(31.8-38.3)     | 34.5<br>(32.2-36.8)     | 32.2<br>(27.8-36.7)     | 29.5<br>(26.8-32.2)          | .007              | 5.7<br>(1.7 to 9.8)                                            |

<sup>a</sup> Estimated prevalence were adjusted for NHANES survey weights.

<sup>b</sup> Values may not equal the difference between the first cycle and last cycle estimates because of rounding.

**eTable 4.** Crude Trends in Estimated Prevalence of Physical Activity Among US Adults 20 Years or Older, 1999 to 2006 and 2007 to March 2020

|                                        | Estimated prevalence of physical activity (95% CI) <sup>a</sup> |                      |                      |                      |                   | Estimated prevalence of physical activity (95% CI) <sup>a</sup> |                      |                      |                      |                      |                      |                            |                   | Difference, 2017-March 2020 vs 2007-2008 (95% CI) <sup>b</sup> |
|----------------------------------------|-----------------------------------------------------------------|----------------------|----------------------|----------------------|-------------------|-----------------------------------------------------------------|----------------------|----------------------|----------------------|----------------------|----------------------|----------------------------|-------------------|----------------------------------------------------------------|
|                                        | 1999-2000 (n = 3967)                                            | 2001-2002 (n = 4295) | 2003-2004 (n = 4120) | 2005-2006 (n = 4184) | P value for trend | Difference, 2005-2006 vs 1999-2000 (95% CI) <sup>b</sup>        | 2007-2008 (n = 5001) | 2009-2010 (n = 5196) | 2011-2012 (n = 4372) | 2013-2014 (n = 4740) | 2015-2016 (n = 4652) | 2017-March 2020 (n = 7325) | P value for trend |                                                                |
| <b>Physical activity, minutes/week</b> |                                                                 |                      |                      |                      |                   |                                                                 |                      |                      |                      |                      |                      |                            |                   |                                                                |
| 0                                      | 20.5<br>(16.8-24.1)                                             | 15.8<br>(13.9-17.7)  | 14.1<br>(12.1-16.1)  | 11.9<br>(10.1-13.7)  | <.001             | -8.6<br>(-12.7 to -4.5)                                         | 22.7<br>(19.9-25.4)  | 22.1<br>(19.9-24.4)  | 20.6<br>(17.9-23.3)  | 23.3<br>(22.3-24.4)  | 20.3<br>(17.2-23.5)  | 19.9<br>(18.4-21.4)        | .06               | -2.7<br>(-5.9 to 0.4)                                          |
| 0.1-149.9                              | 23.8<br>(21.9-25.7)                                             | 24.6<br>(22.6-26.7)  | 27.8<br>(25.1-30.4)  | 25.8<br>(23.9-27.6)  | .048              | 1.9<br>(-0.7 to 4.6)                                            | 13.0<br>(11.6-14.4)  | 14.1<br>(12.2-16.0)  | 13.6<br>(12.2-15.1)  | 14.0<br>(12.9-15.1)  | 12.9<br>(11.6-14.2)  | 11.0<br>(10.0-11.9)        | .002              | -2.0<br>(-3.7 to -0.3)                                         |
| 150-300                                | 15.4<br>(13.0-17.7)                                             | 15.1<br>(13.7-16.5)  | 17.4<br>(15.7-19.1)  | 16.2<br>(14.5-17.8)  | .31               | 0.8<br>(-2.2 to 3.8)                                            | 12.6<br>(11.1-14.0)  | 13.1<br>(11.8-14.4)  | 13.1<br>(11.8-14.4)  | 12.7<br>(11.2-14.3)  | 11.9<br>(10.0-13.8)  | 11.1<br>(9.9-12.3)         | .03               | -1.5<br>(-3.3 to 0.4)                                          |
| >300                                   | 40.4<br>(36.6-44.1)                                             | 44.4<br>(40.9-48.0)  | 40.8<br>(37.1-44.4)  | 46.2<br>(43.0-49.4)  | .09               | 5.9<br>(0.8 to 10.9)                                            | 51.8<br>(49.0-54.6)  | 50.7<br>(46.8-54.5)  | 52.7<br>(49.7-55.6)  | 49.9<br>(47.5-52.3)  | 54.9<br>(52.3-57.4)  | 58.0<br>(56.2-59.8)        | <.001             | 6.2<br>(2.9 to 9.5)                                            |
| ≥150                                   | 55.7<br>(51.8-59.6)                                             | 59.6<br>(56.3-62.8)  | 58.1<br>(54.8-61.5)  | 62.4<br>(59.3-65.5)  | .02               | 6.7<br>(1.6 to 11.7)                                            | 64.4<br>(61.1-67.6)  | 63.8<br>(60.5-67.1)  | 65.8<br>(63.1-68.5)  | 62.6<br>(61.0-64.2)  | 66.7<br>(63.3-70.2)  | 69.1<br>(67.2-71.1)        | .003              | 4.8<br>(0.9 to 8.6)                                            |

<sup>a</sup> Estimated prevalence were adjusted for NHANES survey weights.

<sup>b</sup> Values may not equal the difference between the first cycle and last cycle estimates because of rounding.

**eTable 5.** Adjusted Trends in Estimated Prevalence of Healthy Lifestyle Factors Among US Adults 20 Years or Older, 1999 to March 2020<sup>a</sup>

|                                                                | Estimated prevalence of healthy lifestyle factors, % (95% CI) |                                     |
|----------------------------------------------------------------|---------------------------------------------------------------|-------------------------------------|
|                                                                | Age-adjusted                                                  | Multivariable-adjusted <sup>b</sup> |
| <b>Never smoking</b>                                           |                                                               |                                     |
| 1999-2000                                                      | 48.5 (45.5 to 51.5)                                           | 52.4 (49.7-55.0)                    |
| 2001-2002                                                      | 50.2 (45.8 to 54.7)                                           | 53.1 (48.7-57.6)                    |
| 2003-2004                                                      | 47.6 (45.9 to 49.4)                                           | 50.6 (48.9-52.3)                    |
| 2005-2006                                                      | 50.0 (48.1 to 51.9)                                           | 52.3 (50.1-54.6)                    |
| 2007-2008                                                      | 51.3 (48.1 to 54.5)                                           | 53.8 (51.5-56.0)                    |
| 2009-2010                                                      | 54.6 (51.0 to 58.2)                                           | 56.9 (53.8-60.0)                    |
| 2011-2012                                                      | 54.4 (51.5 to 57.2)                                           | 56.1 (53.4-58.7)                    |
| 2013-2014                                                      | 56.4 (53.3 to 59.4)                                           | 57.8 (55.0-60.6)                    |
| 2015-2016                                                      | 55.5 (53.5 to 57.4)                                           | 56.1 (54.4-57.7)                    |
| 2017-March 2020                                                | 57.4 (55.3 to 59.6)                                           | 57.6 (55.9-59.4)                    |
| <i>P</i> for trend                                             | <.001                                                         | <.001                               |
| Difference, 2017-March 2020 vs 1999-2000 (95% CI) <sup>c</sup> | 8.9 (5.2 to 12.7)                                             | 5.3 (2.2 to 8.3)                    |
| <b>Non-heavy drinking</b>                                      |                                                               |                                     |
| 1999-2000                                                      | 91.3 (89.7 to 92.9)                                           | 92.9 (91.2-94.5)                    |
| 2001-2002                                                      | 92.3 (90.9 to 93.7)                                           | 93.9 (92.5-95.3)                    |
| 2003-2004                                                      | 92.6 (91.3 to 94.0)                                           | 94.2 (92.7-95.7)                    |
| 2005-2006                                                      | 91.0 (89.5 to 92.6)                                           | 92.6 (91.0-94.1)                    |
| 2007-2008                                                      | 92.2 (90.5 to 93.9)                                           | 93.7 (92.0-95.4)                    |
| 2009-2010                                                      | 91.1 (89.6 to 92.6)                                           | 92.4 (91.0-93.9)                    |
| 2011-2012                                                      | 89.8 (88.1 to 91.5)                                           | 91.0 (89.2-92.8)                    |
| 2013-2014                                                      | 91.7 (90.5 to 92.9)                                           | 92.8 (91.6-94.0)                    |
| 2015-2016                                                      | 91.8 (90.4 to 93.2)                                           | 92.8 (91.4-94.1)                    |
| 2017-March 2020                                                | 92.6 (91.5 to 93.6)                                           | 93.5 (92.5-94.5)                    |
| <i>P</i> for trend                                             | .68                                                           | .50                                 |
| Difference, 2017-March 2020 vs 1999-2000 (95% CI) <sup>c</sup> | 1.3 (-0.6 to 3.1)                                             | 0.7 (-1.3 to 2.6)                   |
| <b>Healthy diet</b>                                            |                                                               |                                     |
| 1999-2000                                                      | 20.6 (17.4 to 23.8)                                           | 20.2 (17.6-22.9)                    |
| 2001-2002                                                      | 22.8 (20.3 to 25.3)                                           | 21.7 (19.4-24.0)                    |
| 2003-2004                                                      | 21.0 (19.3 to 22.6)                                           | 20.2 (18.9-21.5)                    |
| 2005-2006                                                      | 22.9 (21.1 to 24.7)                                           | 21.7 (20.0-23.4)                    |
| 2007-2008                                                      | 24.5 (19.9 to 29.1)                                           | 23.5 (19.6-27.3)                    |
| 2009-2010                                                      | 28.1 (26.3 to 29.9)                                           | 26.8 (25.1-28.5)                    |
| 2011-2012                                                      | 29.7 (26.5 to 33.0)                                           | 28.0 (25.0-30.9)                    |

|                                                                | Estimated prevalence of healthy lifestyle factors, % (95% CI) |                                     |
|----------------------------------------------------------------|---------------------------------------------------------------|-------------------------------------|
|                                                                | Age-adjusted                                                  | Multivariable-adjusted <sup>b</sup> |
| 2013-2014                                                      | 28.1 (25.8 to 30.3)                                           | 26.3 (24.5-28.0)                    |
| 2015-2016                                                      | 27.3 (24.2 to 30.4)                                           | 25.0 (22.2-27.7)                    |
| 2017-March 2020                                                | 25.0 (22.0 to 28.0)                                           | 22.6 (19.9-25.2)                    |
| <i>P</i> for trend                                             | <.001                                                         | .006                                |
| Difference, 2017-March 2020 vs 1999-2000 (95% CI) <sup>c</sup> | 4.4 (0.0 to 8.7)                                              | 2.3 (-1.5 to 6.2)                   |
| <b>Sufficient physical activity</b>                            |                                                               |                                     |
| 1999-2000                                                      | 54.1 (50.1 to 58.1)                                           | 49.4 (45.8-53.0)                    |
| 2001-2002                                                      | 57.9 (54.5 to 61.3)                                           | 51.7 (48.6-54.8)                    |
| 2003-2004                                                      | 56.7 (53.3 to 60.0)                                           | 50.6 (47.4-53.8)                    |
| 2005-2006                                                      | 61.0 (57.8 to 64.3)                                           | 54.6 (51.7-57.4)                    |
| 2007-2008                                                      | 62.9 (59.7 to 66.1)                                           | 57.4 (54.6-60.1)                    |
| 2009-2010                                                      | 62.5 (59.3 to 65.7)                                           | 56.6 (53.8-59.4)                    |
| 2011-2012                                                      | 64.7 (62.3 to 67.0)                                           | 58.4 (56.1-60.8)                    |
| 2013-2014                                                      | 61.6 (59.8 to 63.3)                                           | 55.4 (53.6-57.2)                    |
| 2015-2016                                                      | 66.1 (62.9 to 69.3)                                           | 59.6 (57.1-62.1)                    |
| 2017-March 2020                                                | 68.4 (66.5 to 70.3)                                           | 61.8 (59.8-63.7)                    |
| <i>P</i> for trend                                             | <.001                                                         | <.001                               |
| Difference, 2017-March 2020 vs 1999-2000 (95% CI) <sup>c</sup> | 14.3 (9.9 to 18.7)                                            | 12.4 (12.3 to 12.4)                 |
| <b>Normal weight</b>                                           |                                                               |                                     |
| 1999-2000                                                      | 32.4 (29.6 to 35.2)                                           | 29.3 (26.7-31.8)                    |
| 2001-2002                                                      | 32.1 (30.3 to 34.0)                                           | 28.9 (26.9-30.8)                    |
| 2003-2004                                                      | 31.6 (29.6 to 33.6)                                           | 28.6 (26.6-30.6)                    |
| 2005-2006                                                      | 30.5 (27.5 to 33.6)                                           | 27.5 (24.4-30.5)                    |
| 2007-2008                                                      | 29.6 (27.8 to 31.5)                                           | 26.5 (24.7-28.3)                    |
| 2009-2010                                                      | 28.1 (25.4 to 30.7)                                           | 25.0 (22.4-27.5)                    |
| 2011-2012                                                      | 29.6 (26.4 to 32.8)                                           | 26.3 (23.3-29.2)                    |
| 2013-2014                                                      | 27.7 (26.1 to 29.3)                                           | 24.5 (22.9-26.1)                    |
| 2015-2016                                                      | 25.8 (23.2 to 28.4)                                           | 22.4 (20.0-24.7)                    |
| 2017-March 2020                                                | 24.4 (22.3 to 26.4)                                           | 20.9 (19.0-22.8)                    |
| <i>P</i> for trend                                             | <.001                                                         | <.001                               |
| Difference, 2017-March 2020 vs 1999-2000 (95% CI) <sup>c</sup> | -8.0 (-11.5 to -4.5)                                          | -8.3 (-11.7 to -5.0)                |

<sup>a</sup> Healthy lifestyle factors included never smoking, non-heavy drinking ( $\leq 14$  drinks/week for men or  $\leq 7$  drinks/week for women), healthy diet (a Healthy Eating Index-2015 score  $\geq 60$ ), sufficient physical activity ( $\geq 150$  minutes/week moderate to vigorous intensity physical activity), normal weight (body mass index at 18.5–24.9 kg/m<sup>2</sup>).

<sup>b</sup> Multivariable adjusted models included age group (20-34, 35-49, 50-64, ≥65 y), sex (women, men), race/ethnicity (non-Hispanic White, non-Hispanic Black, Mexican American, other), education level (less than high school, high school or equivalent, college or above), and family income–poverty ratio level (<1.30, 1.30-3.49, ≥3.50). Missing values in education and income (n=38 without education data; n=4065 without income data) were imputed using multiple imputation.

<sup>c</sup> Values may not equal the difference between the first cycle and last cycle estimates because of rounding.



**eTable 6.** Adjusted Trends in Estimated Prevalence of Healthy Lifestyle Among US Adults 20 Years or Older, 1999 to March 2020<sup>a</sup>

|                                                                | Estimated prevalence of healthy lifestyle, %<br>(95% CI) |                                     |
|----------------------------------------------------------------|----------------------------------------------------------|-------------------------------------|
|                                                                | Age-adjusted                                             | Multivariable-adjusted <sup>b</sup> |
| 1999-2000                                                      | 15.4 (12.4 to 18.4)                                      | 14.0 (11.7-16.4)                    |
| 2001-2002                                                      | 18.5 (16.3 to 20.7)                                      | 16.3 (14.1-18.4)                    |
| 2003-2004                                                      | 16.5 (14.1 to 19.0)                                      | 14.6 (12.5-16.7)                    |
| 2005-2006                                                      | 17.7 (15.2 to 20.1)                                      | 15.3 (13.0-17.6)                    |
| 2007-2008                                                      | 19.0 (15.0 to 23.0)                                      | 16.9 (13.7-20.0)                    |
| 2009-2010                                                      | 20.9 (17.8 to 23.9)                                      | 18.5 (15.6-21.3)                    |
| 2011-2012                                                      | 22.6 (18.6 to 26.6)                                      | 19.6 (16.0-23.1)                    |
| 2013-2014                                                      | 21.0 (18.9 to 23.1)                                      | 18.0 (16.3-19.7)                    |
| 2015-2016                                                      | 20.9 (18.5 to 23.3)                                      | 17.3 (15.4-19.3)                    |
| 2017-March 2020                                                | 20.1 (17.7 to 22.6)                                      | 16.5 (14.4-18.5)                    |
| <i>P</i> for trend                                             | <.001                                                    | .04                                 |
| Difference, 2017-March 2020 vs 1999-2000 (95% CI) <sup>c</sup> | 4.8 (0.8 to 8.7)                                         | 2.4 (-0.9 to 5.7)                   |

<sup>a</sup> Healthy lifestyle was defined as 4 or 5 of healthy lifestyle factors.

<sup>b</sup> Multivariable adjusted models included age group (20-34, 35-49, 50-64, ≥65 y), sex (women, men), race/ethnicity (non-Hispanic White, non-Hispanic Black, Mexican American, other), education level (less than high school, high school or equivalent, college or above), and family income-poverty ratio level (<1.30, 1.30-3.49, ≥3.50). Missing values in education and income (n=38 without education data; n=4065 without income data) were imputed using multiple imputation.

<sup>c</sup> Values may not equal the difference between the first cycle and last cycle estimates because of rounding.

**eTable 7.** Crude Trends in Estimated Prevalence of Healthy Lifestyle by Age Group, Sex, Race and Ethnicity, Educational Level, and Income, 1999 to March 2020<sup>a</sup>

|                             | Estimated prevalence of healthy lifestyle (95% CI) <sup>b</sup> |                     |                     |                     |                     |                     |                     |                     |                     |                     | P value for trend | Difference, 2017-March 2020 vs 1999-2000 (95% CI) <sup>b</sup> |  |
|-----------------------------|-----------------------------------------------------------------|---------------------|---------------------|---------------------|---------------------|---------------------|---------------------|---------------------|---------------------|---------------------|-------------------|----------------------------------------------------------------|--|
|                             | 1999-2000                                                       | 2001-2002           | 2003-2004           | 2005-2006           | 2007-2008           | 2009-2010           | 2011-2012           | 2013-2014           | 2015-2016           | 2017-March 2020     |                   |                                                                |  |
| <b>Age group, y</b>         |                                                                 |                     |                     |                     |                     |                     |                     |                     |                     |                     |                   |                                                                |  |
| 20-34                       | 17.7<br>(14.3-21.2)                                             | 21.6<br>(14.6-28.6) | 18.8<br>(14.9-22.7) | 20.2<br>(15.6-24.8) | 22.7<br>(17.0-28.4) | 26.4<br>(19.0-33.7) | 29.8<br>(22.1-37.4) | 26.4<br>(22.8-30.0) | 29.1<br>(23.5-34.7) | 26.2<br>(22.0-30.4) | <.001             | 8.5<br>(3.0 to 14.0)                                           |  |
| 35-49                       | 15.1<br>(9.5-20.6)                                              | 18.4<br>(15.1-21.7) | 14.5<br>(10.5-18.4) | 18.4<br>(15.5-21.3) | 17.4<br>(13.2-21.7) | 19.5<br>(16.1-22.9) | 21.0<br>(16.0-26.1) | 21.2<br>(18.0-24.4) | 19.8<br>(15.9-23.7) | 19.3<br>(15.8-22.7) | .04               | 4.2<br>(-2.4 to 10.8)                                          |  |
| 50-64                       | 12.1<br>(8.9-15.2)                                              | 15.5<br>(12.7-18.4) | 17.1<br>(13.3-20.8) | 13.3<br>(9.6-17.0)  | 17.7<br>(12.7-22.7) | 17.3<br>(13.7-21.0) | 18.9<br>(15.3-22.4) | 17.9<br>(14.9-21.0) | 16.4<br>(13.4-19.3) | 16.8<br>(14.0-19.7) | .07               | 4.7<br>(0.5 to 9.0)                                            |  |
| ≥65                         | 18.0<br>(15.4-20.5)                                             | 18.9<br>(15.4-22.5) | 17.0<br>(14.1-19.8) | 19.4<br>(14.8-24.0) | 18.5<br>(14.0-22.9) | 20.5<br>(17.2-23.8) | 20.2<br>(15.1-25.2) | 18.0<br>(16.2-19.8) | 17.9<br>(13.9-22.0) | 18.0<br>(14.6-21.4) | .88               | 0.04<br>(-4.28 to 4.35)                                        |  |
| P value for interaction     |                                                                 |                     |                     |                     |                     | .01                 |                     |                     |                     |                     |                   |                                                                |  |
| FDR P value for interaction |                                                                 |                     |                     |                     |                     | .09                 |                     |                     |                     |                     |                   |                                                                |  |
| <b>Sex</b>                  |                                                                 |                     |                     |                     |                     |                     |                     |                     |                     |                     |                   |                                                                |  |
| Women                       | 17.9<br>(14.3-21.6)                                             | 21.3<br>(18.7-23.9) | 19.8<br>(16.2-23.4) | 20.9<br>(18.0-23.8) | 22.2<br>(17.2-27.2) | 23.4<br>(20.4-26.3) | 24.6<br>(20.2-29.0) | 23.3<br>(20.8-25.7) | 23.8<br>(20.5-27.2) | 23.3<br>(20.6-26.0) | .004              | 5.4<br>(0.8 to 10.0)                                           |  |
| Men                         | 13.4<br>(10.7-)                                                 | 16.0<br>(13.2-)     | 13.6<br>(11.8-)     | 14.5<br>(11.7-)     | 15.7<br>(12.0-)     | 18.5<br>(14.7-)     | 20.7<br>(16.2-)     | 18.9<br>(16.4-)     | 18.1<br>(15.3-)     | 17.1<br>(14.4-)     | .002              | 3.7<br>(-0.2 to 7.5)                                           |  |

|                             | Estimated prevalence of healthy lifestyle (95% CI) <sup>b</sup> |             |             |             |             |             |             |             |             |                 | P value for trend | Difference, 2017-March 2020 vs 1999-2000 (95% CI) <sup>b</sup> |
|-----------------------------|-----------------------------------------------------------------|-------------|-------------|-------------|-------------|-------------|-------------|-------------|-------------|-----------------|-------------------|----------------------------------------------------------------|
|                             | 1999-2000                                                       | 2001-2002   | 2003-2004   | 2005-2006   | 2007-2008   | 2009-2010   | 2011-2012   | 2013-2014   | 2015-2016   | 2017-March 2020 |                   |                                                                |
|                             | 16.1)                                                           | 18.8)       | 15.5)       | 17.3)       | 19.4)       | 22.3)       | 25.2)       | 21.4)       | 20.8)       | 19.7)           |                   |                                                                |
| P value for interaction     |                                                                 |             |             |             |             | .65         |             |             |             |                 |                   |                                                                |
| FDR P value for interaction |                                                                 |             |             |             |             | .76         |             |             |             |                 |                   |                                                                |
| <b>Race/ethnicity</b>       |                                                                 |             |             |             |             |             |             |             |             |                 |                   |                                                                |
| Non-Hispanic White          | 16.3                                                            | 19.9        | 17.4        | 18.2        | 19.3        | 21.7        | 22.6        | 20.3        | 20.5        | 19.6            | .10               | 3.3                                                            |
|                             | (12.1-20.5)                                                     | (17.5-22.4) | (14.7-20.1) | (15.0-21.5) | (13.6-25.1) | (17.5-26.0) | (17.2-28.0) | (17.6-23.1) | (17.9-23.2) | (16.2-23.0)     |                   | (-2.2 to 8.7)                                                  |
| Non-Hispanic Black          | 11.0                                                            | 10.6        | 14.0        | 13.4        | 12.2        | 13.8        | 16.2        | 15.0        | 17.2        | 15.2            | .004              | 4.2                                                            |
|                             | (7.2-14.9)                                                      | (7.0-14.2)  | (9.4-18.5)  | (10.8-16.0) | (10.0-14.4) | (9.8-17.7)  | (13.8-18.6) | (11.6-18.5) | (12.9-21.5) | (13.1-17.3)     |                   | (-0.2 to 8.6)                                                  |
| Mexican American            | 14.1                                                            | 17.3        | 13.3        | 15.4        | 16.6        | 16.5        | 19.8        | 19.0        | 16.7        | 19.8            | .02               | 5.7                                                            |
|                             | (10.1-18.1)                                                     | (13.2-21.4) | (8.6-18.0)  | (12.1-18.7) | (13.3-19.9) | (11.8-21.1) | (14.6-25.1) | (15.3-22.7) | (13.6-19.8) | (15.9-23.7)     |                   | (0.1 to 11.3)                                                  |
| P value for interaction     |                                                                 |             |             |             |             | .29         |             |             |             |                 |                   |                                                                |
| FDR P value for interaction |                                                                 |             |             |             |             | .51         |             |             |             |                 |                   |                                                                |
| <b>Education level</b>      |                                                                 |             |             |             |             |             |             |             |             |                 |                   |                                                                |
| Less than high school       | 9.0                                                             | 8.3         | 7.5         | 12.2        | 10.6        | 12.4        | 12.6        | 10.9        | 10.7        | 10.9            | .03               | 2.0                                                            |
|                             | (7.2-10.7)                                                      | (4.5-12.1)  | (5.4-9.5)   | (9.4-15.0)  | (7.6-13.7)  | (9.9-15.0)  | (9.3-16.0)  | (7.9-13.9)  | (7.7-13.7)  | (8.0-13.9)      |                   | (-1.5 to 5.4)                                                  |
| High school or equivalent   | 10.3                                                            | 12.4        | 12.3        | 11.8        | 13.5        | 10.8        | 13.3        | 12.3        | 12.3        | 14.0            | .16               | 3.7                                                            |
|                             | (7.3-13.3)                                                      | (8.7-16.1)  | (9.5-15.2)  | (9.1-14.5)  | (9.4-17.5)  | (8.8-12.8)  | (9.3-17.2)  | (9.8-14.8)  | (9.4-15.2)  | (11.5-16.5)     |                   | (-0.3 to 7.6)                                                  |

|                                                      | Estimated prevalence of healthy lifestyle (95% CI) <sup>b</sup> |                     |                     |                     |                     |                     |                     |                     |                     |                     | P value for trend | Difference, 2017-March 2020 vs 1999-2000 (95% CI) <sup>b</sup> |
|------------------------------------------------------|-----------------------------------------------------------------|---------------------|---------------------|---------------------|---------------------|---------------------|---------------------|---------------------|---------------------|---------------------|-------------------|----------------------------------------------------------------|
|                                                      | 1999-2000                                                       | 2001-2002           | 2003-2004           | 2005-2006           | 2007-2008           | 2009-2010           | 2011-2012           | 2013-2014           | 2015-2016           | 2017-March 2020     |                   |                                                                |
| College or above                                     | 21.9<br>(17.7-26.2)                                             | 24.8<br>(22.3-27.3) | 21.7<br>(18.7-24.7) | 22.0<br>(18.3-25.7) | 24.8<br>(20.5-29.1) | 27.4<br>(23.1-31.7) | 28.1<br>(23.3-32.9) | 26.5<br>(23.7-29.2) | 25.9<br>(23.5-28.3) | 24.5<br>(21.9-27.2) | .046              | 2.6<br>(-2.5 to 7.6)                                           |
| P value for interaction                              |                                                                 |                     |                     |                     |                     |                     |                     |                     |                     |                     | .63               |                                                                |
| FDR P value for interaction                          |                                                                 |                     |                     |                     |                     |                     |                     |                     |                     |                     | .76               |                                                                |
| <b>Family income–poverty ratio level<sup>c</sup></b> |                                                                 |                     |                     |                     |                     |                     |                     |                     |                     |                     |                   |                                                                |
| <1.30                                                | 9.3<br>(5.0-13.6)                                               | 10.8<br>(6.5-15.0)  | 13.3<br>(10.4-16.2) | 12.1<br>(9.3-14.9)  | 12.9<br>(8.6-17.2)  | 14.3<br>(10.9-17.8) | 17.8<br>(11.0-24.7) | 16.0<br>(12.2-19.9) | 14.9<br>(10.9-18.8) | 14.7<br>(11.6-17.8) | .005              | 5.4<br>(0.0 to 10.7)                                           |
| 1.30-3.49                                            | 12.2<br>(9.0-15.4)                                              | 15.2<br>(10.6-19.8) | 14.0<br>(10.5-17.5) | 15.4<br>(12.9-17.9) | 16.9<br>(12.0-21.8) | 18.5<br>(15.8-21.1) | 17.8<br>(14.8-20.7) | 17.7<br>(14.2-21.2) | 18.8<br>(15.5-22.2) | 18.2<br>(15.6-20.7) | .002              | 6.0<br>(1.8 to 10.1)                                           |
| ≥3.50                                                | 21.5<br>(16.4-26.6)                                             | 25.1<br>(22.4-27.8) | 21.4<br>(17.9-24.8) | 22.2<br>(18.2-26.1) | 23.5<br>(18.6-28.4) | 26.2<br>(20.3-32.0) | 29.8<br>(23.6-36.0) | 26.8<br>(23.9-29.8) | 25.8<br>(23.6-28.0) | 24.1<br>(20.5-27.6) | .10               | 2.6<br>(-3.7 to 8.8)                                           |
| P value for interaction                              |                                                                 |                     |                     |                     |                     |                     |                     |                     |                     |                     | .18               |                                                                |
| FDR P value for interaction                          |                                                                 |                     |                     |                     |                     |                     |                     |                     |                     |                     | .41               |                                                                |

Abbreviations: FDR, false discovery rate.

<sup>a</sup> Estimated prevalence were adjusted for NHANES survey weights.

<sup>b</sup> Values may not equal the difference between the first cycle and last cycle estimates because of rounding.

<sup>c</sup> The variable was calculated by dividing family income by the poverty guidelines. A higher ratio represents a higher level of income.

**eTable 8.** Crude Trends in Estimated Prevalence of Never Smoking by Age Group, Sex, Race and Ethnicity, Educational Level, and Income, 1999 to March 2020

|                             | Estimated prevalence of never smoking (95% CI) <sup>a</sup> |                     |                     |                     |                     |                     |                     |                     |                     |                     | P value for trend | Difference, 2017-March 2020 vs 1999-2000 (95% CI) <sup>b</sup> |
|-----------------------------|-------------------------------------------------------------|---------------------|---------------------|---------------------|---------------------|---------------------|---------------------|---------------------|---------------------|---------------------|-------------------|----------------------------------------------------------------|
|                             | 1999-2000                                                   | 2001-2002           | 2003-2004           | 2005-2006           | 2007-2008           | 2009-2010           | 2011-2012           | 2013-2014           | 2015-2016           | 2017-March 2020     |                   |                                                                |
| <b>Age group, y</b>         |                                                             |                     |                     |                     |                     |                     |                     |                     |                     |                     |                   |                                                                |
| 20-34                       | 56.9<br>(51.3-62.6)                                         | 56.9<br>(48.4-65.3) | 57.6<br>(53.7-61.6) | 53.9<br>(48.9-58.9) | 55.7<br>(49.1-62.2) | 61.4<br>(54.5-68.2) | 63.6<br>(56.7-70.4) | 64.6<br>(60.6-68.6) | 65.2<br>(60.9-69.5) | 66.5<br>(61.4-71.6) | <.001             | 9.6<br>(1.9 to 17.2)                                           |
| 35-49                       | 47.5<br>(43.1-51.9)                                         | 53.5<br>(47.1-59.8) | 46.0<br>(41.6-50.4) | 53.9<br>(51.6-56.1) | 54.2<br>(49.7-58.7) | 56.7<br>(53.1-60.4) | 57.1<br>(52.3-62.0) | 59.1<br>(55.3-62.9) | 58.4<br>(53.7-63.1) | 56.8<br>(52.1-61.5) | <.001             | 9.3<br>(2.8 to 15.8)                                           |
| 50-64                       | 42.3<br>(37.5-47.2)                                         | 40.3<br>(35.7-44.9) | 42.6<br>(38.9-46.2) | 45.7<br>(41.5-49.9) | 47.6<br>(44.8-50.5) | 49.3<br>(44.4-54.2) | 48.8<br>(44.3-53.3) | 50.5<br>(45.1-55.9) | 49.0<br>(44.3-53.8) | 54.5<br>(49.8-59.1) | <.001             | 12.1<br>(5.3 to 18.9)                                          |
| ≥65                         | 49.0<br>(45.1-52.9)                                         | 51.4<br>(46.8-56.1) | 44.8<br>(40.6-48.9) | 46.6<br>(40.7-52.5) | 48.1<br>(44.4-51.7) | 51.1<br>(48.2-53.9) | 46.9<br>(42.6-51.2) | 50.9<br>(46.7-55.2) | 48.7<br>(44.6-52.8) | 51.4<br>(47.7-55.0) | .20               | 2.4<br>(-3.0 to 7.8)                                           |
| P value for interaction     |                                                             |                     |                     |                     |                     | .01                 |                     |                     |                     |                     |                   |                                                                |
| FDR P value for interaction |                                                             |                     |                     |                     |                     | .09                 |                     |                     |                     |                     |                   |                                                                |
| <b>Sex</b>                  |                                                             |                     |                     |                     |                     |                     |                     |                     |                     |                     |                   |                                                                |
| Women                       | 57.5<br>(55.4-59.6)                                         | 57.7<br>(52.7-62.6) | 55.4<br>(52.5-58.3) | 56.9<br>(54.2-59.7) | 58.8<br>(55.2-62.5) | 60.3<br>(56.8-63.8) | 61.1<br>(57.0-65.1) | 61.7<br>(58.2-65.1) | 63.0<br>(60.0-66.0) | 64.2<br>(61.5-66.9) | <.001             | 6.7<br>(3.3 to 10.2)                                           |
| Men                         | 40.8<br>(36.4-)                                             | 44.0<br>(38.8-)     | 40.7<br>(37.5-)     | 43.7<br>(40.6-)     | 44.0<br>(40.0-)     | 49.6<br>(44.9-)     | 48.2<br>(43.7-)     | 51.6<br>(48.1-)     | 47.9<br>(45.2-)     | 50.8<br>(48.1-)     | <.001             | 10.0<br>(4.8 to 15.2)                                          |

| Estimated prevalence of never smoking (95% CI) <sup>a</sup> |                         |                         |                         |                         |                         |                         |                         |                         |                         |                         | Difference,<br>2017-March<br>2020 vs<br>1999-2000<br>(95% CI) <sup>b</sup> |                       |
|-------------------------------------------------------------|-------------------------|-------------------------|-------------------------|-------------------------|-------------------------|-------------------------|-------------------------|-------------------------|-------------------------|-------------------------|----------------------------------------------------------------------------|-----------------------|
|                                                             | 1999-<br>2000           | 2001-<br>2002           | 2003-<br>2004           | 2005-<br>2006           | 2007-<br>2008           | 2009-<br>2010           | 2011-<br>2012           | 2013-<br>2014           | 2015-<br>2016           | 2017-<br>March<br>2020  |                                                                            | P value<br>for trend  |
|                                                             | 45.3)                   | 49.2)                   | 43.9)                   | 46.9)                   | 48.1)                   | 54.2)                   | 52.7)                   | 55.1)                   | 50.7)                   | 53.5)                   |                                                                            |                       |
| <i>P</i> value for interaction                              |                         |                         |                         |                         |                         | .37                     |                         |                         |                         |                         |                                                                            |                       |
| FDR <i>P</i> value for<br>interaction                       |                         |                         |                         |                         |                         | .62                     |                         |                         |                         |                         |                                                                            |                       |
| <b>Race/ethnicity</b>                                       |                         |                         |                         |                         |                         |                         |                         |                         |                         |                         |                                                                            |                       |
| Non-Hispanic White                                          | 46.1<br>(42.4-<br>49.9) | 49.4<br>(43.9-<br>54.9) | 45.4<br>(43.4-<br>47.4) | 47.0<br>(44.0-<br>50.0) | 48.8<br>(45.0-<br>52.5) | 52.3<br>(48.1-<br>56.4) | 51.4<br>(47.5-<br>55.2) | 53.3<br>(48.7-<br>57.9) | 51.5<br>(48.4-<br>54.6) | 53.7<br>(51.2-<br>56.3) | <.001                                                                      | 7.6<br>(3.1 to 12.2)  |
| Non-Hispanic Black                                          | 58.7<br>(52.4-<br>64.9) | 55.6<br>(50.1-<br>61.1) | 57.8<br>(51.2-<br>64.4) | 57.2<br>(51.4-<br>62.9) | 56.4<br>(51.3-<br>61.5) | 56.1<br>(51.9-<br>60.2) | 60.9<br>(57.3-<br>64.6) | 59.1<br>(54.9-<br>63.2) | 60.2<br>(55.9-<br>64.5) | 61.3<br>(56.7-<br>65.9) | .10                                                                        | 2.6<br>(-5.2 to 10.5) |
| Mexican American                                            | 57.6<br>(50.8-<br>64.3) | 58.1<br>(50.0-<br>66.2) | 56.0<br>(50.7-<br>61.2) | 60.4<br>(56.9-<br>64.0) | 62.8<br>(57.5-<br>68.0) | 64.5<br>(60.3-<br>68.6) | 63.3<br>(56.4-<br>70.3) | 68.4<br>(64.7-<br>72.0) | 67.2<br>(62.4-<br>71.9) | 67.4<br>(62.5-<br>72.3) | <.001                                                                      | 9.8<br>(1.4 to 18.2)  |
| <i>P</i> value for interaction                              |                         |                         |                         |                         |                         | .17                     |                         |                         |                         |                         |                                                                            |                       |
| FDR <i>P</i> value for<br>interaction                       |                         |                         |                         |                         |                         | .41                     |                         |                         |                         |                         |                                                                            |                       |
| <b>Education level</b>                                      |                         |                         |                         |                         |                         |                         |                         |                         |                         |                         |                                                                            |                       |
| Less than high school                                       | 44.5<br>(39.9-<br>49.0) | 40.8<br>(35.7-<br>45.8) | 40.8<br>(34.6-<br>47.0) | 44.0<br>(39.5-<br>48.5) | 42.6<br>(36.5-<br>48.7) | 43.0<br>(36.7-<br>49.2) | 41.6<br>(36.0-<br>47.1) | 43.9<br>(39.8-<br>48.1) | 49.8<br>(42.2-<br>57.5) | 46.2<br>(41.2-<br>51.1) | .12                                                                        | 1.7<br>(-5.0 to 8.4)  |
| High school or<br>equivalent                                | 42.9<br>(38.6-<br>47.2) | 42.3<br>(37.7-<br>46.9) | 42.6<br>(39.3-<br>45.9) | 45.9<br>(42.6-<br>49.3) | 48.6<br>(43.7-<br>53.5) | 47.4<br>(42.9-<br>52.0) | 47.2<br>(41.6-<br>52.8) | 49.1<br>(43.5-<br>54.6) | 43.8<br>(40.4-<br>47.3) | 50.1<br>(47.2-<br>53.0) | <.001                                                                      | 7.2<br>(1.9 to 12.5)  |

| Estimated prevalence of never smoking (95% CI) <sup>a</sup> |                         |                         |                         |                         |                         |                         |                         |                         |                         |                         | Difference,<br>2017-March<br>2020 vs<br>1999-2000<br>(95% CI) <sup>b</sup> |                       |
|-------------------------------------------------------------|-------------------------|-------------------------|-------------------------|-------------------------|-------------------------|-------------------------|-------------------------|-------------------------|-------------------------|-------------------------|----------------------------------------------------------------------------|-----------------------|
|                                                             | 1999-<br>2000           | 2001-<br>2002           | 2003-<br>2004           | 2005-<br>2006           | 2007-<br>2008           | 2009-<br>2010           | 2011-<br>2012           | 2013-<br>2014           | 2015-<br>2016           | 2017-<br>March<br>2020  | P value<br>for trend                                                       |                       |
| College or above                                            | 55.4<br>(52.0-<br>58.8) | 58.0<br>(52.7-<br>63.4) | 53.3<br>(51.0-<br>55.6) | 54.4<br>(51.5-<br>57.4) | 56.7<br>(53.2-<br>60.2) | 61.6<br>(57.3-<br>65.8) | 60.2<br>(55.9-<br>64.5) | 62.3<br>(58.5-<br>66.0) | 60.7<br>(58.4-<br>63.1) | 62.9<br>(61.0-<br>64.8) | <.001                                                                      | 7.5<br>(3.5 to 11.4)  |
| P value for interaction                                     |                         |                         |                         |                         |                         | .26                     |                         |                         |                         |                         |                                                                            |                       |
| FDR P value for<br>interaction                              |                         |                         |                         |                         |                         | .48                     |                         |                         |                         |                         |                                                                            |                       |
| <b>Family income–poverty ratio level<sup>c</sup></b>        |                         |                         |                         |                         |                         |                         |                         |                         |                         |                         |                                                                            |                       |
| <1.30                                                       | 45.8<br>(40.3-<br>51.2) | 46.7<br>(39.3-<br>54.2) | 43.1<br>(38.7-<br>47.5) | 44.1<br>(40.4-<br>47.8) | 44.3<br>(37.6-<br>50.9) | 47.0<br>(41.3-<br>52.7) | 50.0<br>(43.7-<br>56.3) | 47.3<br>(42.5-<br>52.1) | 49.1<br>(45.0-<br>53.3) | 48.6<br>(44.7-<br>52.5) | .08                                                                        | 2.8<br>(-3.9 to 9.6)  |
| 1.30-3.49                                                   | 49.3<br>(43.8-<br>54.8) | 45.5<br>(39.3-<br>51.6) | 46.7<br>(44.2-<br>49.1) | 48.3<br>(45.6-<br>50.9) | 52.1<br>(46.4-<br>57.9) | 53.3<br>(49.9-<br>56.6) | 52.2<br>(48.7-<br>55.6) | 54.9<br>(48.6-<br>61.3) | 53.4<br>(49.5-<br>57.3) | 54.7<br>(50.4-<br>59.1) | <.001                                                                      | 5.5<br>(-1.6 to 12.5) |
| ≥3.50                                                       | 52.3<br>(48.9-<br>55.6) | 56.4<br>(51.3-<br>61.6) | 52.6<br>(49.6-<br>55.6) | 55.0<br>(51.5-<br>58.6) | 55.5<br>(51.6-<br>59.4) | 60.5<br>(55.2-<br>65.7) | 59.4<br>(54.6-<br>64.2) | 62.1<br>(57.4-<br>66.9) | 61.1<br>(57.6-<br>64.6) | 63.3<br>(60.8-<br>65.7) | <.001                                                                      | 11.0<br>(6.8 to 15.2) |
| P value for interaction                                     |                         |                         |                         |                         |                         | .10                     |                         |                         |                         |                         |                                                                            |                       |
| FDR P value for<br>interaction                              |                         |                         |                         |                         |                         | .39                     |                         |                         |                         |                         |                                                                            |                       |

Abbreviations: FDR, false discovery rate.

<sup>a</sup> Estimated prevalence were adjusted for NHANES survey weights.

<sup>b</sup> Values may not equal the difference between the first cycle and last cycle estimates because of rounding.

<sup>c</sup> The variable was calculated by dividing family income by the poverty guidelines. A higher ratio represents a higher level of income.

**eTable 9.** Crude Trends in Estimated Prevalence of Moderate or Lighter Alcohol Consumption by Age Group, Sex, Race and Ethnicity, Educational Level, and Income, 1999 to March 2020<sup>a</sup>

|                                    | Estimated prevalence of moderate or lighter alcohol consumption (95% CI) <sup>b</sup> |                     |                     |                     |                     |                     |                     |                     |                     |                     | <i>P</i> value for trend | Difference, 2017-March 2020 vs 1999-2000 (95% CI) <sup>c</sup> |
|------------------------------------|---------------------------------------------------------------------------------------|---------------------|---------------------|---------------------|---------------------|---------------------|---------------------|---------------------|---------------------|---------------------|--------------------------|----------------------------------------------------------------|
|                                    | 1999-2000                                                                             | 2001-2002           | 2003-2004           | 2005-2006           | 2007-2008           | 2009-2010           | 2011-2012           | 2013-2014           | 2015-2016           | 2017-March 2020     |                          |                                                                |
| <b>Age group, y</b>                |                                                                                       |                     |                     |                     |                     |                     |                     |                     |                     |                     |                          |                                                                |
| 20-34                              | 90.7<br>(88.7-92.7)                                                                   | 90.8<br>(87.5-94.1) | 91.5<br>(88.8-94.1) | 88.3<br>(84.6-92.1) | 89.9<br>(87.3-92.5) | 89.8<br>(88.0-91.5) | 90.3<br>(87.4-93.3) | 91.5<br>(89.8-93.2) | 91.1<br>(88.2-94.0) | 92.8<br>(91.0-94.6) | .11                      | 2.1<br>(-0.6 to 4.8)                                           |
| 35-49                              | 89.4<br>(86.3-92.4)                                                                   | 91.3<br>(89.3-93.4) | 91.5<br>(89.0-94.1) | 90.4<br>(89.0-91.8) | 90.5<br>(88.0-92.9) | 89.4<br>(87.3-91.6) | 90.1<br>(87.0-93.2) | 89.9<br>(86.7-93.0) | 91.8<br>(89.2-94.3) | 91.3<br>(88.3-94.3) | .68                      | 1.9<br>(-2.4 to 6.2)                                           |
| 50-64                              | 90.8<br>(87.5-94.1)                                                                   | 90.8<br>(87.5-94.2) | 92.0<br>(90.3-93.7) | 89.9<br>(87.3-92.6) | 92.8<br>(89.9-95.8) | 90.4<br>(88.0-92.9) | 84.9<br>(81.2-88.5) | 90.2<br>(88.6-91.8) | 88.9<br>(86.4-91.5) | 90.7<br>(88.2-93.2) | .23                      | -0.1<br>(-4.3 to 4.1)                                          |
| ≥65                                | 94.6<br>(92.7-96.5)                                                                   | 96.4<br>(95.1-97.7) | 95.4<br>(93.4-97.3) | 96.0<br>(95.1-96.9) | 96.0<br>(94.7-97.2) | 94.8<br>(92.9-96.8) | 94.6<br>(92.6-96.6) | 95.2<br>(92.9-97.4) | 95.4<br>(92.9-97.8) | 95.3<br>(93.8-96.8) | .69                      | 0.7<br>(-1.8 to 3.2)                                           |
| <i>P</i> value for interaction     |                                                                                       |                     |                     |                     |                     | .23                 |                     |                     |                     |                     |                          |                                                                |
| FDR <i>P</i> value for interaction |                                                                                       |                     |                     |                     |                     | .48                 |                     |                     |                     |                     |                          |                                                                |
| <b>Sex</b>                         |                                                                                       |                     |                     |                     |                     |                     |                     |                     |                     |                     |                          |                                                                |
| Women                              | 92.7<br>(90.2-95.2)                                                                   | 94.4<br>(92.3-96.5) | 94.1<br>(92.5-95.8) | 92.9<br>(90.8-94.9) | 93.1<br>(90.5-95.8) | 92.2<br>(90.5-94.0) | 90.0<br>(87.0-93.0) | 92.0<br>(90.2-93.7) | 92.6<br>(91.0-94.2) | 93.8<br>(92.6-94.9) | .43                      | 1.1<br>(-1.7 to 3.8)                                           |
| Men                                | 89.2<br>(87.1-)                                                                       | 89.3<br>(87.5-)     | 90.4<br>(88.9-)     | 88.4<br>(86.7-)     | 90.4<br>(88.4-)     | 89.2<br>(87.3-)     | 89.0<br>(87.2-)     | 90.8<br>(89.2-)     | 90.6<br>(88.2-)     | 90.9<br>(89.2-)     | .09                      | 1.7<br>(-1.0 to 4.5)                                           |



| Estimated prevalence of moderate or lighter alcohol consumption (95% CI) <sup>b</sup> |                         |                         |                         |                         |                         |                         |                         |                         |                         |                         | P<br>value<br>for<br>trend | Difference,<br>2017-March<br>2020 vs 1999-<br>2000 (95%<br>CI) <sup>c</sup> |
|---------------------------------------------------------------------------------------|-------------------------|-------------------------|-------------------------|-------------------------|-------------------------|-------------------------|-------------------------|-------------------------|-------------------------|-------------------------|----------------------------|-----------------------------------------------------------------------------|
| 1999-<br>2000                                                                         | 2001-<br>2002           | 2003-<br>2004           | 2005-<br>2006           | 2007-<br>2008           | 2009-<br>2010           | 2011-<br>2012           | 2013-<br>2014           | 2015-<br>2016           | 2017-<br>March<br>2020  |                         |                            |                                                                             |
|                                                                                       | 91.4)                   | 91.0)                   | 91.9)                   | 90.0)                   | 92.4)                   | 91.0)                   | 90.7)                   | 92.5)                   | 93.0)                   | 92.6)                   |                            |                                                                             |
| <i>P</i> value for interaction                                                        |                         |                         |                         |                         |                         | .09                     |                         |                         |                         |                         |                            |                                                                             |
| FDR <i>P</i> value for<br>interaction                                                 |                         |                         |                         |                         |                         | .38                     |                         |                         |                         |                         |                            |                                                                             |
| <b>Race/ethnicity</b>                                                                 |                         |                         |                         |                         |                         |                         |                         |                         |                         |                         |                            |                                                                             |
| Non-Hispanic White                                                                    | 89.6<br>(87.3-<br>91.8) | 91.0<br>(89.5-<br>92.6) | 92.2<br>(90.8-<br>93.7) | 89.2<br>(87.2-<br>91.3) | 91.8<br>(89.9-<br>93.8) | 89.8<br>(87.8-<br>91.8) | 88.0<br>(85.8-<br>90.2) | 90.3<br>(88.7-<br>92.0) | 90.2<br>(87.8-<br>92.6) | 91.4<br>(89.9-<br>93.0) | .94                        | 1.8<br>(-0.9 to 4.6)                                                        |
| Non-Hispanic Black                                                                    | 95.1<br>(93.5-<br>96.6) | 92.9<br>(90.3-<br>95.6) | 93.4<br>(91.1-<br>95.7) | 93.5<br>(91.2-<br>95.8) | 90.9<br>(88.6-<br>93.2) | 91.7<br>(88.9-<br>94.4) | 91.4<br>(89.2-<br>93.5) | 92.2<br>(90.0-<br>94.4) | 93.2<br>(90.9-<br>95.5) | 92.4<br>(91.2-<br>93.6) | .13                        | -2.7<br>(-4.6 to -0.7)                                                      |
| Mexican American                                                                      | 93.7<br>(91.9-<br>95.5) | 93.9<br>(91.6-<br>96.2) | 93.9<br>(92.0-<br>95.7) | 94.6<br>(92.0-<br>97.2) | 89.7<br>(85.6-<br>93.8) | 92.8<br>(90.9-<br>94.6) | 94.5<br>(92.3-<br>96.6) | 94.5<br>(91.3-<br>97.7) | 94.2<br>(92.4-<br>96.0) | 95.2<br>(93.6-<br>96.9) | .10                        | 1.6<br>(-0.9 to 4.0)                                                        |
| <i>P</i> value for interaction                                                        |                         |                         |                         |                         |                         | .08                     |                         |                         |                         |                         |                            |                                                                             |
| FDR <i>P</i> value for<br>interaction                                                 |                         |                         |                         |                         |                         | .38                     |                         |                         |                         |                         |                            |                                                                             |
| <b>Education level</b>                                                                |                         |                         |                         |                         |                         |                         |                         |                         |                         |                         |                            |                                                                             |
| Less than high school                                                                 | 91.6<br>(90.2-<br>93.0) | 92.5<br>(90.3-<br>94.7) | 91.7<br>(89.9-<br>93.5) | 89.2<br>(86.6-<br>91.9) | 90.7<br>(87.2-<br>94.1) | 88.7<br>(85.6-<br>91.7) | 93.0<br>(90.5-<br>95.5) | 93.0<br>(90.1-<br>95.9) | 93.5<br>(92.0-<br>95.0) | 91.8<br>(87.6-<br>96.0) | .47                        | 0.1<br>(-4.3 to 4.6)                                                        |
| High school or<br>equivalent                                                          | 90.3<br>(87.6-<br>93.0) | 90.4<br>(88.2-<br>92.5) | 91.4<br>(88.1-<br>94.6) | 91.1<br>(88.2-<br>94.1) | 89.1<br>(86.2-<br>92.1) | 89.2<br>(86.2-<br>92.2) | 86.6<br>(82.5-<br>90.6) | 90.5<br>(88.0-<br>93.0) | 89.5<br>(84.8-<br>94.1) | 93.6<br>(91.6-<br>95.7) | .20                        | 3.3<br>(-0.1 to 6.7)                                                        |

|                                                      | Estimated prevalence of moderate or lighter alcohol consumption (95% CI) <sup>b</sup> |                     |                     |                     |                     |                     |                     |                     |                     |                     | <i>P</i> value for trend | Difference, 2017-March 2020 vs 1999-2000 (95% CI) <sup>c</sup> |
|------------------------------------------------------|---------------------------------------------------------------------------------------|---------------------|---------------------|---------------------|---------------------|---------------------|---------------------|---------------------|---------------------|---------------------|--------------------------|----------------------------------------------------------------|
|                                                      | 1999-2000                                                                             | 2001-2002           | 2003-2004           | 2005-2006           | 2007-2008           | 2009-2010           | 2011-2012           | 2013-2014           | 2015-2016           | 2017-March 2020     |                          |                                                                |
| College or above                                     | 91.1<br>(88.9-93.2)                                                                   | 92.4<br>(90.5-94.2) | 92.9<br>(91.4-94.4) | 90.9<br>(89.1-92.7) | 93.5<br>(91.6-95.4) | 91.9<br>(90.3-93.5) | 89.6<br>(87.4-91.7) | 91.4<br>(90.0-92.7) | 91.9<br>(90.6-93.2) | 91.9<br>(90.7-93.2) | .63                      | 0.9<br>(-1.6 to 3.4)                                           |
| <i>P</i> value for interaction                       |                                                                                       |                     |                     |                     |                     |                     |                     |                     |                     |                     |                          |                                                                |
| FDR <i>P</i> value for interaction                   |                                                                                       |                     |                     |                     |                     |                     |                     |                     |                     |                     |                          |                                                                |
| <b>Family income–poverty ratio level<sup>d</sup></b> |                                                                                       |                     |                     |                     |                     |                     |                     |                     |                     |                     |                          |                                                                |
| <1.30                                                | 92.9<br>(91.4-94.5)                                                                   | 94.2<br>(92.2-96.2) | 91.9<br>(90.1-93.7) | 90.0<br>(87.1-92.8) | 90.6<br>(88.0-93.3) | 88.1<br>(84.4-91.8) | 88.7<br>(85.4-92.1) | 92.5<br>(89.8-95.2) | 93.2<br>(91.2-95.1) | 93.6<br>(92.3-94.8) | .65                      | 0.6<br>(-1.4 to 2.7)                                           |
| 1.30-3.49                                            | 90.3<br>(87.5-93.2)                                                                   | 92.2<br>(90.5-94.0) | 93.1<br>(90.9-95.4) | 91.5<br>(88.8-94.3) | 92.7<br>(91.3-94.0) | 91.8<br>(89.5-94.1) | 90.4<br>(87.9-93.0) | 91.8<br>(89.2-94.3) | 92.2<br>(89.7-94.6) | 92.9<br>(91.0-94.8) | .52                      | 2.6<br>(-0.9 to 6.0)                                           |
| ≥3.50                                                | 90.8<br>(89.0-92.7)                                                                   | 90.8<br>(88.6-93.0) | 92.2<br>(90.1-94.3) | 90.5<br>(88.5-92.5) | 91.5<br>(88.6-94.3) | 90.5<br>(88.7-92.4) | 89.1<br>(85.8-92.3) | 90.3<br>(88.8-91.9) | 89.4<br>(86.8-92.0) | 91.8<br>(90.0-93.6) | .78                      | 1.0<br>(-1.6 to 3.6)                                           |
| <i>P</i> value for interaction                       |                                                                                       |                     |                     |                     |                     |                     |                     |                     |                     |                     |                          |                                                                |
| FDR <i>P</i> value for interaction                   |                                                                                       |                     |                     |                     |                     |                     |                     |                     |                     |                     |                          |                                                                |

Abbreviations: FDR, false discovery rate.

<sup>a</sup> Moderate or lighter alcohol consumption was defined as ≤14 drinks/week for men or ≤7 drinks/week for women.

<sup>b</sup> Estimated prevalence were adjusted for NHANES survey weights.

<sup>c</sup> Values may not equal the difference between the first cycle and last cycle estimates because of rounding.

<sup>d</sup> The variable was calculated by dividing family income by the poverty guidelines. A higher ratio represents a higher level of income.

**eTable 10.** Crude Trends in Estimated Prevalence of Healthy Diet by Age Group, Sex, Race and Ethnicity, Educational Level, and Income, 1999 to March 2020<sup>a</sup>

|                             | Estimated prevalence of healthy diet (95% CI) <sup>b</sup> |                     |                     |                     |                     |                     |                     |                     |                     |                     | P value for trend | Difference, 2017-March 2020 vs 1999-2000 (95% CI) <sup>c</sup> |
|-----------------------------|------------------------------------------------------------|---------------------|---------------------|---------------------|---------------------|---------------------|---------------------|---------------------|---------------------|---------------------|-------------------|----------------------------------------------------------------|
|                             | 1999-2000                                                  | 2001-2002           | 2003-2004           | 2005-2006           | 2007-2008           | 2009-2010           | 2011-2012           | 2013-2014           | 2015-2016           | 2017-March 2020     |                   |                                                                |
| <b>Age group, y</b>         |                                                            |                     |                     |                     |                     |                     |                     |                     |                     |                     |                   |                                                                |
| 20-34                       | 9.3<br>(6.3-12.3)                                          | 12.0<br>(9.5-14.6)  | 11.8<br>(8.8-14.9)  | 14.2<br>(10.4-18.0) | 16.6<br>(11.8-21.5) | 19.6<br>(15.2-24.0) | 22.8<br>(18.7-27.0) | 20.2<br>(17.0-23.3) | 23.5<br>(17.7-29.2) | 18.7<br>(14.4-23.0) | <.001             | 9.4<br>(4.1 to 14.7)                                           |
| 35-49                       | 18.6<br>(13.5-23.8)                                        | 19.7<br>(15.9-23.5) | 15.9<br>(13.7-18.2) | 19.7<br>(16.0-23.5) | 18.4<br>(12.6-24.2) | 22.5<br>(19.1-26.0) | 23.2<br>(18.4-28.0) | 25.0<br>(22.3-27.8) | 24.0<br>(19.0-29.0) | 22.3<br>(18.7-26.0) | .004              | 3.7<br>(-2.6 to 10.0)                                          |
| 50-64                       | 23.8<br>(19.0-28.6)                                        | 26.8<br>(23.7-29.9) | 25.8<br>(22.6-29.0) | 23.2<br>(19.4-26.9) | 30.0<br>(24.3-35.8) | 32.5<br>(27.8-37.2) | 33.8<br>(28.9-38.7) | 30.6<br>(25.6-35.7) | 27.3<br>(22.5-32.1) | 26.9<br>(23.2-30.6) | .13               | 3.0<br>(-3.1 to 9.1)                                           |
| ≥65                         | 31.4<br>(26.2-36.5)                                        | 33.2<br>(29.0-37.4) | 31.1<br>(27.9-34.2) | 35.4<br>(29.9-40.9) | 33.3<br>(28.2-38.4) | 38.4<br>(34.6-42.3) | 39.0<br>(31.4-46.5) | 36.2<br>(31.8-40.6) | 34.0<br>(29.5-38.4) | 31.6<br>(27.2-35.9) | .80               | 0.2<br>(-6.6 to 7.0)                                           |
| P value for interaction     |                                                            |                     |                     |                     |                     | <.001               |                     |                     |                     |                     |                   |                                                                |
| FDR P value for interaction |                                                            |                     |                     |                     |                     | .004                |                     |                     |                     |                     |                   |                                                                |
| <b>Sex</b>                  |                                                            |                     |                     |                     |                     |                     |                     |                     |                     |                     |                   |                                                                |
| Women                       | 21.1<br>(16.9-25.3)                                        | 23.8<br>(21.0-26.7) | 21.0<br>(17.9-24.2) | 23.5<br>(20.8-26.3) | 26.5<br>(21.1-31.9) | 30.1<br>(28.1-32.1) | 31.7<br>(27.6-35.7) | 29.5<br>(27.3-31.8) | 29.9<br>(25.1-34.7) | 27.3<br>(23.9-30.7) | <.001             | 6.3<br>(0.8 to 11.7)                                           |
| Men                         | 17.4<br>(14.4-)                                            | 18.8<br>(16.0-)     | 18.5<br>(16.6-)     | 20.0<br>(17.2-)     | 19.9<br>(15.8-)     | 24.1<br>(21.6-)     | 26.2<br>(23.1-)     | 25.0<br>(22.1-)     | 23.7<br>(20.0-)     | 21.5<br>(18.5-)     | <.001             | 4.1<br>(-0.1 to 8.4)                                           |

| Estimated prevalence of healthy diet (95% CI) <sup>b</sup> |                         |                         |                         |                         |                         |                         |                         |                         |                         |                         | Difference,<br>2017-March<br>2020 vs<br>1999-2000<br>(95% CI) <sup>c</sup> |                       |
|------------------------------------------------------------|-------------------------|-------------------------|-------------------------|-------------------------|-------------------------|-------------------------|-------------------------|-------------------------|-------------------------|-------------------------|----------------------------------------------------------------------------|-----------------------|
|                                                            | 1999-<br>2000           | 2001-<br>2002           | 2003-<br>2004           | 2005-<br>2006           | 2007-<br>2008           | 2009-<br>2010           | 2011-<br>2012           | 2013-<br>2014           | 2015-<br>2016           | 2017-<br>March<br>2020  | <i>P</i> value<br>for<br>trend                                             |                       |
|                                                            | 20.4)                   | 21.7)                   | 20.4)                   | 22.9)                   | 24.1)                   | 26.5)                   | 29.3)                   | 28.0)                   | 27.3)                   | 24.5)                   |                                                                            |                       |
| <i>P</i> value for interaction                             |                         |                         |                         |                         |                         | .44                     |                         |                         |                         |                         |                                                                            |                       |
| FDR <i>P</i> value for<br>interaction                      |                         |                         |                         |                         |                         | .68                     |                         |                         |                         |                         |                                                                            |                       |
| <b>Race/ethnicity</b>                                      |                         |                         |                         |                         |                         |                         |                         |                         |                         |                         |                                                                            |                       |
| Non-Hispanic White                                         | 19.4<br>(15.3-<br>23.4) | 22.5<br>(19.6-<br>25.3) | 20.8<br>(18.6-<br>23.0) | 22.6<br>(20.1-<br>25.0) | 23.8<br>(17.5-<br>30.0) | 29.0<br>(26.8-<br>31.3) | 29.6<br>(25.4-<br>33.8) | 27.6<br>(24.7-<br>30.4) | 27.4<br>(23.8-<br>30.9) | 24.3<br>(20.0-<br>28.5) | .002                                                                       | 4.9 (-1.0 to<br>10.9) |
| Non-Hispanic Black                                         | 13.3<br>(9.4-17.1)      | 16.1<br>(11.3-<br>20.8) | 13.5<br>(10.0-<br>17.1) | 17.0<br>(13.0-<br>21.0) | 18.3<br>(15.0-<br>21.7) | 18.1<br>(13.7-<br>22.4) | 20.4<br>(14.4-<br>26.5) | 20.2<br>(16.3-<br>24.0) | 18.3<br>(14.8-<br>21.7) | 18.1<br>(15.7-<br>20.4) | .009                                                                       | 4.8<br>(0.3 to 9.4)   |
| Mexican American                                           | 22.0<br>(18.6-<br>25.4) | 21.7<br>(18.3-<br>25.1) | 16.1<br>(12.0-<br>20.2) | 22.1<br>(17.2-<br>27.0) | 22.2<br>(18.2-<br>26.3) | 24.3<br>(21.4-<br>27.1) | 23.7<br>(19.1-<br>28.4) | 24.8<br>(19.8-<br>29.8) | 19.3<br>(14.2-<br>24.4) | 23.4<br>(18.2-<br>28.7) | .32                                                                        | 1.4<br>(-4.9 to 7.7)  |
| <i>P</i> value for interaction                             |                         |                         |                         |                         |                         | .56                     |                         |                         |                         |                         |                                                                            |                       |
| FDR <i>P</i> value for<br>interaction                      |                         |                         |                         |                         |                         | .76                     |                         |                         |                         |                         |                                                                            |                       |
| <b>Education level</b>                                     |                         |                         |                         |                         |                         |                         |                         |                         |                         |                         |                                                                            |                       |
| Less than high school                                      | 18.1<br>(15.2-<br>21.1) | 14.3<br>(11.8-<br>16.9) | 14.3<br>(11.3-<br>17.4) | 20.7<br>(16.1-<br>25.2) | 16.8<br>(14.1-<br>19.4) | 21.2<br>(17.2-<br>25.3) | 21.7<br>(18.5-<br>24.9) | 18.3<br>(14.4-<br>22.1) | 18.7<br>(15.0-<br>22.3) | 23.2<br>(18.9-<br>27.5) | .002                                                                       | 5.1<br>(-0.2 to 10.3) |
| High school or<br>equivalent                               | 14.6<br>(11.3-<br>17.8) | 16.6<br>(12.8-<br>20.4) | 14.8<br>(11.9-<br>17.7) | 15.3<br>(11.7-<br>18.8) | 17.8<br>(13.0-<br>22.7) | 19.9<br>(17.3-<br>22.5) | 23.7<br>(18.3-<br>29.1) | 18.0<br>(14.8-<br>21.2) | 17.9<br>(14.6-<br>21.3) | 18.0<br>(14.1-<br>22.0) | .07                                                                        | 3.5<br>(-1.7 to 8.6)  |

|                                                      | Estimated prevalence of healthy diet (95% CI) <sup>b</sup> |                     |                     |                     |                     |                     |                     |                     |                     |                     | P value for trend | Difference, 2017-March 2020 vs 1999-2000 (95% CI) <sup>c</sup> |
|------------------------------------------------------|------------------------------------------------------------|---------------------|---------------------|---------------------|---------------------|---------------------|---------------------|---------------------|---------------------|---------------------|-------------------|----------------------------------------------------------------|
|                                                      | 1999-2000                                                  | 2001-2002           | 2003-2004           | 2005-2006           | 2007-2008           | 2009-2010           | 2011-2012           | 2013-2014           | 2015-2016           | 2017-March 2020     |                   |                                                                |
| College or above                                     | 22.3<br>(17.7-27.0)                                        | 25.8<br>(22.1-29.4) | 23.8<br>(21.4-26.2) | 25.0<br>(22.9-27.1) | 28.4<br>(23.1-33.7) | 31.8<br>(29.3-34.4) | 32.4<br>(28.6-36.2) | 32.6<br>(30.3-34.9) | 31.4<br>(27.7-35.1) | 27.6<br>(24.4-30.7) | <.001             | 5.2<br>(-0.5 to 10.9)                                          |
| P value for interaction                              |                                                            |                     |                     |                     |                     |                     |                     |                     |                     |                     | .64               |                                                                |
| FDR P value for interaction                          |                                                            |                     |                     |                     |                     |                     |                     |                     |                     |                     | .76               |                                                                |
| <b>Family income–poverty ratio level<sup>d</sup></b> |                                                            |                     |                     |                     |                     |                     |                     |                     |                     |                     |                   |                                                                |
| <1.30                                                | 17.1<br>(13.7-20.6)                                        | 12.4<br>(10.7-14.1) | 12.5<br>(8.9-16.2)  | 17.5<br>(15.0-20.0) | 16.9<br>(12.5-21.3) | 19.0<br>(16.2-21.9) | 20.2<br>(16.3-24.1) | 17.8<br>(15.1-20.5) | 19.1<br>(16.7-21.6) | 18.3<br>(14.3-22.3) | .009              | 1.1<br>(-4.2 to 6.5)                                           |
| 1.30-3.49                                            | 15.7<br>(12.9-18.6)                                        | 18.8<br>(15.0-22.5) | 19.5<br>(15.8-23.1) | 20.3<br>(17.0-23.6) | 21.5<br>(16.1-26.9) | 24.3<br>(22.5-26.2) | 25.5<br>(22.4-28.6) | 25.7<br>(23.1-28.4) | 21.8<br>(18.2-25.5) | 22.2<br>(19.7-24.8) | <.001             | 6.5<br>(2.7 to 10.4)                                           |
| ≥3.50                                                | 22.7<br>(17.8-27.5)                                        | 27.2<br>(23.7-30.7) | 23.7<br>(21.9-25.4) | 25.0<br>(21.5-28.4) | 27.3<br>(22.5-32.1) | 33.0<br>(29.6-36.4) | 36.8<br>(31.9-41.6) | 34.1<br>(30.2-37.9) | 33.9<br>(30.5-37.3) | 27.8<br>(23.3-32.3) | <.001             | 5.1<br>(-1.5 to 11.8)                                          |
| P value for interaction                              |                                                            |                     |                     |                     |                     |                     |                     |                     |                     |                     | .97               |                                                                |
| FDR P value for interaction                          |                                                            |                     |                     |                     |                     |                     |                     |                     |                     |                     | .97               |                                                                |

Abbreviations: FDR, false discovery rate.

<sup>a</sup> Healthy diet was defined as a Healthy Eating Index-2015 score ≥60.

<sup>b</sup> Estimated prevalence were adjusted for NHANES survey weights.

<sup>c</sup> Values may not equal the difference between the first cycle and last cycle estimates because of rounding.

<sup>d</sup> The variable was calculated by dividing family income by the poverty guidelines. A higher ratio represents a higher level of income.

**eTable 11.** Crude Trends in Estimated Prevalence of Sufficient Physical Activity by Age Group, Sex, Race and Ethnicity, Educational Level, and Income, 1999 to 2006<sup>a</sup>

|                             | Prevalence of sufficient physical activity (95% CI) <sup>b</sup> |                     |                     |                     | P value for trend | Difference, 2005-2006 vs 1999-2000 (95% CI) <sup>c</sup> |
|-----------------------------|------------------------------------------------------------------|---------------------|---------------------|---------------------|-------------------|----------------------------------------------------------|
|                             | 1999-2000                                                        | 2001-2002           | 2003-2004           | 2005-2006           |                   |                                                          |
| <b>Age group, y</b>         |                                                                  |                     |                     |                     |                   |                                                          |
| 20-34                       | 61.1<br>(57.5-64.6)                                              | 65.6<br>(59.9-71.3) | 61.9<br>(57.1-66.7) | 67.4<br>(63.7-71.2) | .09               | 6.4<br>(1.1 to 11.6)                                     |
| 35-49                       | 55.9<br>(50.7-61.0)                                              | 60.5<br>(58.2-62.7) | 57.0<br>(53.2-60.7) | 65.6<br>(59.6-71.6) | .045              | 9.7<br>(1.7 to 17.8)                                     |
| 50-64                       | 55.0<br>(48.1-61.9)                                              | 57.2<br>(51.9-62.6) | 61.8<br>(55.9-67.7) | 60.3<br>(54.7-65.8) | .16               | 5.2<br>(-3.8 to 14.3)                                    |
| ≥65                         | 47.6<br>(41.0-54.1)                                              | 50.7<br>(44.2-57.3) | 48.7<br>(44.3-53.1) | 52.0<br>(47.7-56.3) | .37               | 4.4<br>(-3.6 to 12.4)                                    |
| P value for interaction     |                                                                  |                     | .74                 |                     |                   |                                                          |
| FDR P value for interaction |                                                                  |                     | .79                 |                     |                   |                                                          |
| <b>Sex</b>                  |                                                                  |                     |                     |                     |                   |                                                          |
| Women                       | 51.4<br>(46.6-56.1)                                              | 54.9<br>(50.7-59.1) | 54.4<br>(50.9-57.9) | 58.7<br>(55.3-62.1) | .03               | 7.3<br>(1.3 to 13.3)                                     |
| Men                         | 60.4<br>(56.5-64.3)                                              | 64.5<br>(61.0-68.0) | 62.2<br>(58.2-66.1) | 66.3<br>(62.6-70.0) | .08               | 5.9<br>(0.4 to 11.4)                                     |
| P value for interaction     |                                                                  |                     | .58                 |                     |                   |                                                          |
| FDR P value for interaction |                                                                  |                     | .76                 |                     |                   |                                                          |
| <b>Race/ethnicity</b>       |                                                                  |                     |                     |                     |                   |                                                          |
| Non-Hispanic White          | 60.9<br>(56.6-65.1)                                              | 63.3<br>(59.8-66.8) | 60.7<br>(57.2-64.3) | 64.8<br>(61.3-68.4) | .30               | 4.0<br>(-1.7 to 9.6)                                     |
| Non-Hispanic Black          | 40.2<br>(36.6-43.7)                                              | 44.4<br>(37.8-51.0) | 53.7<br>(48.9-58.5) | 51.1<br>(46.7-55.6) | <.001             | 11.0<br>(5.1 to 16.8)                                    |
| Mexican American            | 45.4<br>(42.4-48.3)                                              | 46.2<br>(41.7-50.8) | 46.1<br>(36.5-55.6) | 48.5<br>(41.3-55.8) | .48               | 3.1<br>(-4.8 to 11.1)                                    |
| P value for interaction     |                                                                  |                     | .06                 |                     |                   |                                                          |
| FDR P value for interaction |                                                                  |                     | .34                 |                     |                   |                                                          |
| <b>Education level</b>      |                                                                  |                     |                     |                     |                   |                                                          |
| Less than high school       | 37.7<br>(33.6-41.7)                                              | 38.9<br>(34.3-43.4) | 41.8<br>(36.8-46.7) | 43.3<br>(37.5-49.1) | .09               | 5.6<br>(-1.6 to 12.9)                                    |
| High school or equivalent   | 52.4<br>(47.3-57.5)                                              | 55.2<br>(50.7-59.7) | 56.5<br>(52.1-61.0) | 57.5<br>(52.0-63.0) | .17               | 5.1<br>(-2.6 to 12.8)                                    |
| College or above            | 66.4<br>(61.0-71.9)                                              | 68.0<br>(65.3-70.7) | 63.8<br>(59.6-68.0) | 69.9<br>(66.8-72.9) | .49               | 3.4<br>(-2.9 to 9.8)                                     |
| P value for interaction     |                                                                  |                     | .65                 |                     |                   |                                                          |

|                                                      | Prevalence of sufficient physical activity (95% CI) <sup>b</sup> |                     |                     |                     | P value for trend | Difference, 2005-2006 vs 1999-2000 (95% CI) <sup>c</sup> |
|------------------------------------------------------|------------------------------------------------------------------|---------------------|---------------------|---------------------|-------------------|----------------------------------------------------------|
|                                                      | 1999-2000                                                        | 2001-2002           | 2003-2004           | 2005-2006           |                   |                                                          |
| FDR P value for interaction                          |                                                                  |                     | .76                 |                     |                   |                                                          |
| <b>Family income–poverty ratio level<sup>d</sup></b> |                                                                  |                     |                     |                     |                   |                                                          |
| <1.30                                                | 41.2<br>(35.6-46.8)                                              | 42.7<br>(35.8-49.5) | 47.1<br>(42.2-52.0) | 50.4<br>(46.1-54.7) | .01               | 9.2<br>(1.9 to 16.4)                                     |
| 1.30-3.49                                            | 52.2<br>(47.4-57.0)                                              | 55.2<br>(52.0-58.4) | 56.3<br>(50.7-61.9) | 59.7<br>(56.3-63.1) | .01               | 7.5<br>(1.5 to 13.5)                                     |
| ≥3.50                                                | 68.1<br>(62.7-73.4)                                              | 70.5<br>(66.9-74.1) | 66.2<br>(62.2-70.2) | 69.9<br>(66.1-73.7) | .91               | 1.8<br>(-4.9 to 8.5)                                     |
| P value for interaction                              |                                                                  | .11                 |                     |                     |                   |                                                          |
| FDR P value for interaction                          |                                                                  | .39                 |                     |                     |                   |                                                          |

Abbreviations: FDR, false discovery rate.

<sup>a</sup> sufficient physical activity was defined as ≥150 minutes/week moderate to vigorous intensity physical activity.

<sup>b</sup> Estimated prevalence was adjusted for NHANES survey weights.

<sup>c</sup> Values may not equal the difference between the first cycle and last cycle estimates because of rounding.

<sup>d</sup> The variable was calculated by dividing family income by the poverty guidelines. A higher ratio represents a higher level of income.

**eTable 12.** Crude Trends in Estimated Prevalence of Sufficient Physical Activity by Age Group, Sex, Race and Ethnicity, Educational Level, and Income, 2007 to March 2020<sup>a</sup>

|                             | Estimated prevalence of sufficient physical activity (95% CI) <sup>b</sup> |                     |                     |                     |                     |                     | P value for trend | Difference, 2017-March 2020 vs 2007-2008 (95% CI) <sup>c</sup> |
|-----------------------------|----------------------------------------------------------------------------|---------------------|---------------------|---------------------|---------------------|---------------------|-------------------|----------------------------------------------------------------|
|                             | 2007-2008                                                                  | 2009-2010           | 2011-2012           | 2013-2014           | 2015-2016           | 2017-March 2020     |                   |                                                                |
| <b>Age group, y</b>         |                                                                            |                     |                     |                     |                     |                     |                   |                                                                |
| 20-34                       | 75.2<br>(71.3-79.2)                                                        | 73.4<br>(67.6-79.1) | 78.3<br>(73.7-82.8) | 73.8<br>(70.9-76.6) | 81.3<br>(77.6-85.1) | 82.0<br>(79.0-85.0) | <.001             | 6.7<br>(1.7 to 11.7)                                           |
| 35-49                       | 66.2<br>(62.3-70.2)                                                        | 66.7<br>(64.3-69.2) | 69.2<br>(64.0-74.4) | 66.7<br>(63.4-70.0) | 70.0<br>(64.6-75.3) | 71.2<br>(68.6-73.7) | .02               | 4.9<br>(0.2 to 9.7)                                            |
| 50-64                       | 61.4<br>(55.3-67.5)                                                        | 62.5<br>(58.9-66.0) | 61.3<br>(57.5-65.2) | 58.0<br>(53.2-62.9) | 60.4<br>(56.4-64.3) | 64.8<br>(61.4-68.2) | .36               | 3.4<br>(-3.7 to 10.5)                                          |
| ≥65                         | 47.5<br>(42.6-52.4)                                                        | 46.0<br>(41.8-50.2) | 48.7<br>(45.5-52.0) | 47.3<br>(43.0-51.5) | 52.2<br>(46.8-57.6) | 55.5<br>(51.6-59.4) | <.001             | 7.9<br>(1.6 to 14.3)                                           |
| P value for interaction     |                                                                            |                     |                     | .06                 |                     |                     |                   |                                                                |
| FDR P value for interaction |                                                                            |                     |                     | .34                 |                     |                     |                   |                                                                |
| <b>Sex</b>                  |                                                                            |                     |                     |                     |                     |                     |                   |                                                                |
| Women                       | 57.4<br>(52.9-61.9)                                                        | 55.1<br>(51.3-59.0) | 58.2<br>(54.8-61.6) | 56.1<br>(53.2-59.0) | 61.5<br>(57.1-66.0) | 62.3<br>(59.9-64.6) | .003              | 4.8<br>(-0.3 to 10.0)                                          |
| Men                         | 72.2<br>(69.1-75.2)                                                        | 72.8<br>(69.7-75.9) | 73.5<br>(70.4-76.7) | 69.5<br>(67.1-71.8) | 72.3<br>(69.3-75.3) | 76.4<br>(73.3-79.4) | .08               | 4.2<br>(-0.2 to 8.5)                                           |
| P value for interaction     |                                                                            |                     |                     | .45                 |                     |                     |                   |                                                                |
| FDR P value for interaction |                                                                            |                     |                     | .68                 |                     |                     |                   |                                                                |
| <b>Race/ethnicity</b>       |                                                                            |                     |                     |                     |                     |                     |                   |                                                                |
| Non-Hispanic White          | 66.8<br>(62.2-71.4)                                                        | 65.9<br>(62.0-69.7) | 67.8<br>(64.5-71.2) | 62.0<br>(59.6-64.3) | 68.6<br>(64.9-72.3) | 70.7<br>(68.2-73.1) | .06               | 3.9<br>(-1.4 to 9.1)                                           |
| Non-Hispanic Black          | 54.0                                                                       | 58.8                | 60.6                | 62.2                | 64.3                | 64.4                | .001              | 10.4                                                           |



|                                                      | Estimated prevalence of sufficient physical activity (95% CI) <sup>b</sup> |                                    |                                    |                                    |                                    |                                    | <i>P</i> value<br>for trend | Difference,<br>2017-March<br>2020 vs 2007-<br>2008 (95%<br>CI) <sup>c</sup> |
|------------------------------------------------------|----------------------------------------------------------------------------|------------------------------------|------------------------------------|------------------------------------|------------------------------------|------------------------------------|-----------------------------|-----------------------------------------------------------------------------|
|                                                      | 2007-2008                                                                  | 2009-2010                          | 2011-2012                          | 2013-2014                          | 2015-2016                          | 2017-March 2020                    |                             |                                                                             |
| Mexican American                                     | (47.3-60.7)<br>62.3<br>(54.6-70.0)                                         | (55.7-62.0)<br>57.9<br>(50.4-65.4) | (56.8-64.5)<br>63.7<br>(55.8-71.6) | (58.1-66.3)<br>63.1<br>(57.3-69.0) | (60.5-68.1)<br>61.1<br>(55.0-67.3) | (60.9-67.9)<br>72.4<br>(69.2-75.6) | .002                        | (2.7 to 18.0)<br>10.1<br>(1.6 to 18.5)                                      |
| <i>P</i> value for interaction                       |                                                                            |                                    |                                    |                                    |                                    |                                    |                             |                                                                             |
| FDR <i>P</i> value for interaction                   |                                                                            |                                    |                                    |                                    |                                    |                                    |                             |                                                                             |
| <b>Education level</b>                               |                                                                            |                                    |                                    |                                    |                                    |                                    |                             |                                                                             |
| Less than high school                                | 52.5<br>(48.1-56.9)                                                        | 52.7<br>(48.9-56.5)                | 52.1<br>(47.0-57.3)                | 54.2<br>(50.5-58.0)                | 50.3<br>(44.4-56.1)                | 57.0<br>(52.1-61.8)                | .30                         | 4.5<br>(-2.1 to 11.1)                                                       |
| High school or equivalent                            | 61.7<br>(57.9-65.5)                                                        | 60.7<br>(57.0-64.5)                | 64.2<br>(57.2-71.3)                | 59.1<br>(55.6-62.6)                | 61.3<br>(56.9-65.7)                | 67.8<br>(64.4-71.2)                | .01                         | 6.1<br>(0.9 to 11.2)                                                        |
| College or above                                     | 69.9<br>(66.6-73.2)                                                        | 68.3<br>(63.7-73.0)                | 69.6<br>(66.4-72.8)                | 65.7<br>(63.6-67.9)                | 71.8<br>(68.8-74.8)                | 71.7<br>(69.4-73.9)                | .13                         | 1.8<br>(-2.3 to 5.8)                                                        |
| <i>P</i> value for interaction                       |                                                                            |                                    |                                    |                                    |                                    |                                    |                             |                                                                             |
| FDR <i>P</i> value for interaction                   |                                                                            |                                    |                                    |                                    |                                    |                                    |                             |                                                                             |
| <b>Family income–poverty ratio level<sup>d</sup></b> |                                                                            |                                    |                                    |                                    |                                    |                                    |                             |                                                                             |
| <1.30                                                | 58.4<br>(53.8-63.0)                                                        | 60.7<br>(56.4-65.0)                | 62.9<br>(57.3-68.4)                | 58.9<br>(56.3-61.4)                | 60.9<br>(56.4-65.4)                | 63.4<br>(60.5-66.3)                | .16                         | 5.0<br>(-0.5 to 10.5)                                                       |
| 1.30-3.49                                            | 61.0<br>(57.0-65.0)                                                        | 59.2<br>(54.1-64.3)                | 66.0<br>(61.4-70.6)                | 60.4<br>(57.7-63.2)                | 64.8<br>(61.0-68.7)                | 67.6<br>(64.2-70.9)                | .005                        | 6.5<br>(1.3 to 11.8)                                                        |
| ≥3.50                                                | 69.9<br>(66.5-73.4)                                                        | 70.2<br>(67.0-73.5)                | 68.9<br>(64.9-72.9)                | 66.5<br>(62.9-70.2)                | 73.5<br>(69.3-77.7)                | 72.3<br>(70.0-74.6)                | .09                         | 2.3<br>(-1.9 to 6.6)                                                        |
| <i>P</i> value for interaction                       |                                                                            |                                    |                                    |                                    |                                    |                                    |                             |                                                                             |
| FDR <i>P</i> value for interaction                   |                                                                            |                                    |                                    |                                    |                                    |                                    |                             |                                                                             |

Abbreviations: FDR, false discovery rate.

<sup>a</sup> sufficient physical activity was defined as  $\geq 150$  minutes/week moderate to vigorous intensity physical activity.

<sup>b</sup> Estimated prevalence was adjusted for NHANES survey weights.

<sup>c</sup> Values may not equal the difference between the first cycle and last cycle estimates because of rounding.

<sup>d</sup> The variable was calculated by dividing family income by the poverty guidelines. A higher ratio represents a higher level of income.

**eTable 13.** Crude Trends in Estimated Prevalence of Healthy Weight by Age Group, Sex, Race and Ethnicity, Educational Level, and Income, 1999 to March 2020<sup>a</sup>

|                             | Estimated prevalence of healthy weight (95% CI) <sup>b</sup> |                     |                     |                     |                     |                     |                     |                     |                     |                     | P value for trend | Difference, 2017-March 2020 vs 1999-2000 (95% CI) <sup>c</sup> |
|-----------------------------|--------------------------------------------------------------|---------------------|---------------------|---------------------|---------------------|---------------------|---------------------|---------------------|---------------------|---------------------|-------------------|----------------------------------------------------------------|
|                             | 1999-2000                                                    | 2001-2002           | 2003-2004           | 2005-2006           | 2007-2008           | 2009-2010           | 2011-2012           | 2013-2014           | 2015-2016           | 2017-March 2020     |                   |                                                                |
| <b>Age group, y</b>         |                                                              |                     |                     |                     |                     |                     |                     |                     |                     |                     |                   |                                                                |
| 20-34                       | 40.2<br>(36.0-44.5)                                          | 41.1<br>(37.3-45.0) | 39.8<br>(36.2-43.4) | 39.7<br>(34.8-44.6) | 39.3<br>(35.7-42.8) | 39.2<br>(34.3-44.1) | 39.7<br>(32.5-47.0) | 36.5<br>(32.7-40.3) | 35.9<br>(31.2-40.7) | 33.9<br>(28.7-39.1) | .009              | -6.3<br>(-13.0 to 0.4)                                         |
| 35-49                       | 32.7<br>(26.6-38.7)                                          | 31.9<br>(29.1-34.8) | 31.0<br>(27.8-34.2) | 30.0<br>(24.2-35.7) | 27.4<br>(23.4-31.4) | 27.2<br>(23.9-30.5) | 25.7<br>(20.6-30.9) | 25.4<br>(21.6-29.2) | 22.6<br>(18.6-26.7) | 20.8<br>(18.0-23.7) | <.001             | -11.8<br>(-18.6 to -5.1)                                       |
| 50-64                       | 27.1<br>(23.9-30.4)                                          | 25.5<br>(22.6-28.5) | 26.6<br>(22.5-30.7) | 23.6<br>(19.0-28.2) | 24.4<br>(20.9-28.0) | 20.3<br>(16.5-24.1) | 24.6<br>(20.4-28.7) | 22.9<br>(21.0-24.8) | 22.6<br>(18.5-26.7) | 20.3<br>(16.9-23.8) | .003              | -6.8<br>(-11.5 to -2.0)                                        |
| ≥65                         | 29.0<br>(24.6-33.4)                                          | 29.1<br>(25.2-33.0) | 29.0<br>(25.4-32.6) | 28.8<br>(25.6-32.0) | 27.5<br>(23.9-31.2) | 25.3<br>(22.8-27.7) | 29.0<br>(24.7-33.2) | 26.3<br>(23.6-28.9) | 21.5<br>(17.5-25.5) | 22.3<br>(19.3-25.3) | <.001             | -6.7<br>(-12.0 to -1.3)                                        |
| P value for interaction     |                                                              |                     |                     |                     |                     | .13                 |                     |                     |                     |                     |                   |                                                                |
| FDR P value for interaction |                                                              |                     |                     |                     |                     | .39                 |                     |                     |                     |                     |                   |                                                                |
| <b>Sex</b>                  |                                                              |                     |                     |                     |                     |                     |                     |                     |                     |                     |                   |                                                                |
| Women                       | 34.5<br>(30.8-38.2)                                          | 35.5<br>(32.1-38.9) | 35.9<br>(32.6-39.2) | 35.6<br>(32.1-39.1) | 32.9<br>(29.9-35.9) | 31.9<br>(29.8-34.0) | 31.4<br>(27.2-35.7) | 31.0<br>(28.3-33.7) | 28.5<br>(25.2-31.9) | 27.6<br>(25.3-30.0) | <.001             | -6.9<br>(-11.3 to -2.5)                                        |
| Men                         | 31.5<br>(28.3-)                                              | 29.4<br>(27.4-)     | 28.1<br>(24.5-)     | 25.8<br>(22.3-)     | 26.6<br>(25.0-)     | 24.6<br>(20.1-)     | 28.3<br>(25.2-)     | 24.8<br>(22.5-)     | 23.4<br>(20.4-)     | 21.5<br>(18.2-)     | <.001             | -10.0<br>(-14.7 to -5.4)                                       |

**Estimated prevalence of healthy weight (95% CI)<sup>b</sup>**

**1999-2000**   **2001-2002**   **2003-2004**   **2005-2006**   **2007-2008**   **2009-2010**   **2011-2012**   **2013-2014**   **2015-2016**   **2017-March 2020**   **P value for trend**   **Difference, 2017-March 2020 vs 1999-2000 (95% CI)<sup>c</sup>**

34.7)   31.3)   31.8)   29.3)   28.2)   29.0)   31.4)   27.1)   26.4)   24.7)

*P* value for interaction   .77

FDR *P* value for interaction   .79

**Race/ethnicity**

Non-Hispanic White   33.9   33.8   33.4   32.3   30.7   28.9   30.8   28.2   26.0   25.5   <.001   -8.5

(29.9-38.0)   (31.3-36.3)   (30.9-35.9)   (28.1-36.5)   (28.3-33.2)   (25.6-32.3)   (26.5-35.1)   (26.4-30.0)   (23.4-28.7)   (22.4-28.5)   (-13.6 to -3.4)

Non-Hispanic Black   29.2   24.5   22.7   22.1   24.2   22.3   23.2   23.3   23.6   21.8   .03   -7.4

(25.8-32.6)   (20.5-28.4)   (19.0-26.5)   (17.8-26.4)   (21.5-26.9)   (18.8-25.7)   (20.8-25.6)   (19.5-27.0)   (19.8-27.5)   (19.4-24.1)   (-11.6 to -3.3)

Mexican American   26.4   29.9   24.0   23.9   21.8   19.2   20.4   16.6   17.8   14.8   <.001   -11.6

(20.4-32.4)   (24.6-35.3)   (18.3-29.7)   (19.2-28.6)   (17.4-26.1)   (13.7-24.8)   (12.7-28.0)   (12.8-20.4)   (14.1-21.4)   (10.9-18.6)   (-18.8 to -4.4)

*P* value for interaction   .003

FDR *P* value for interaction   .047

**Education level**

Less than high school   25.6   26.6   30.2   30.6   27.5   22.1   27.4   23.2   24.7   22.2   .01   -3.4

(22.4-28.8)   (22.2-30.9)   (24.9-35.6)   (27.6-33.5)   (24.6-30.4)   (18.5-25.8)   (23.2-31.6)   (19.9-26.5)   (19.9-29.4)   (19.3-25.0)   (-7.7 to 0.9)

High school or equivalent   33.7   30.6   28.4   26.7   28.3   25.2   23.6   26.2   20.8   23.3   <.001   -10.5

(28.1-39.4)   (27.1-34.0)   (25.3-31.4)   (22.5-30.8)   (25.2-31.3)   (22.0-28.4)   (18.0-29.2)   (22.4-29.9)   (16.6-25.1)   (20.0-26.6)   (-17.1 to -3.9)

**Estimated prevalence of healthy weight (95% CI)<sup>b</sup>**

|                                                      | 1999-<br>2000           | 2001-<br>2002           | 2003-<br>2004           | 2005-<br>2006           | 2007-<br>2008           | 2009-<br>2010           | 2011-<br>2012           | 2013-<br>2014           | 2015-<br>2016           | 2017-<br>March<br>2020  | <i>P</i> value<br>for<br>trend | Difference,<br>2017-March<br>2020 vs 1999-<br>2000 (95%<br>CI) <sup>c</sup> |
|------------------------------------------------------|-------------------------|-------------------------|-------------------------|-------------------------|-------------------------|-------------------------|-------------------------|-------------------------|-------------------------|-------------------------|--------------------------------|-----------------------------------------------------------------------------|
| College or above                                     | 36.3<br>(33.0-<br>39.6) | 35.3<br>(33.2-<br>37.5) | 34.5<br>(31.7-<br>37.3) | 32.8<br>(28.5-<br>37.1) | 31.5<br>(28.9-<br>34.2) | 31.2<br>(27.0-<br>35.4) | 32.4<br>(28.1-<br>36.8) | 29.7<br>(28.0-<br>31.3) | 28.0<br>(25.6-<br>30.4) | 25.6<br>(23.4-<br>27.8) | <.001                          | -10.7<br>(-14.7 to -6.7)                                                    |
| <i>P</i> value for interaction                       |                         |                         |                         |                         |                         | .15                     |                         |                         |                         |                         |                                |                                                                             |
| FDR <i>P</i> value for<br>interaction                |                         |                         |                         |                         |                         | .40                     |                         |                         |                         |                         |                                |                                                                             |
| <b>Family income–poverty ratio level<sup>d</sup></b> |                         |                         |                         |                         |                         |                         |                         |                         |                         |                         |                                |                                                                             |
| <1.30                                                | 32.1<br>(27.1-<br>37.1) | 32.0<br>(28.0-<br>35.9) | 36.7<br>(33.8-<br>39.7) | 29.4<br>(24.7-<br>34.0) | 29.6<br>(26.3-<br>33.0) | 26.9<br>(22.0-<br>31.7) | 27.9<br>(22.1-<br>33.7) | 28.8<br>(25.5-<br>32.0) | 24.7<br>(20.6-<br>28.8) | 25.7<br>(22.8-<br>28.5) | <.001                          | -6.4<br>(-12.3 to -0.6)                                                     |
| 1.30-3.49                                            | 30.3<br>(25.3-<br>35.3) | 30.6<br>(27.2-<br>34.0) | 30.6<br>(27.5-<br>33.6) | 29.1<br>(24.3-<br>33.9) | 28.4<br>(25.5-<br>31.4) | 27.8<br>(25.4-<br>30.2) | 28.2<br>(24.2-<br>32.2) | 24.3<br>(22.0-<br>26.5) | 27.2<br>(23.0-<br>31.5) | 23.2<br>(20.3-<br>26.2) | <.001                          | -7.1<br>(-12.9 to -1.2)                                                     |
| ≥3.50                                                | 34.6<br>(30.0-<br>39.1) | 35.3<br>(31.7-<br>38.9) | 32.0<br>(28.4-<br>35.6) | 32.7<br>(28.9-<br>36.5) | 31.8<br>(29.1-<br>34.5) | 29.2<br>(24.2-<br>34.2) | 32.8<br>(27.4-<br>38.2) | 30.5<br>(27.5-<br>33.5) | 25.7<br>(21.9-<br>29.5) | 24.6<br>(21.5-<br>27.8) | <.001                          | -9.9<br>(-15.5 to -4.3)                                                     |
| <i>P</i> value for interaction                       |                         |                         |                         |                         |                         | .68                     |                         |                         |                         |                         |                                |                                                                             |
| FDR <i>P</i> value for<br>interaction                |                         |                         |                         |                         |                         | .77                     |                         |                         |                         |                         |                                |                                                                             |

Abbreviations: FDR, false discovery rate.

<sup>a</sup> Healthy weight was defined as body mass index at 18.5-24.9 kg/m<sup>2</sup>.

<sup>b</sup> Estimated prevalence were adjusted for NHANES survey weights.

<sup>c</sup> Values may not equal the difference between the first cycle and last cycle estimates because of rounding.

<sup>d</sup> The variable was calculated by dividing family income by the poverty guidelines. A higher ratio represents a higher level of income.
