# Supplementary material for: Trends in Self-Reported Adherence to Healthy Lifestyle Behaviors Among US Adults, 1999 to March 2020
Source: PubMed Central journal article supplement (PMC10349344; doi:10.1001/jamanetworkopen.2023.23584), 2023-07-14
Supplement: jamanetwopen-e2323584-s002.pdf [file jamanetwopen-e2323584-s002.pdf]

## Data Sharing Statement

Li. Trends in Self-Reported Adherence to Healthy Lifestyle Behaviors Among US Adults, 1999 to March 2020. *JAMA Netw Open*. Published July 14, 2023.

doi:10.1001/jamanetworkopen.2023.23584

### Data

**Data available:** Yes

**Data types:** Deidentified participant data

**How to access data:** National Health and Nutrition Examination Survey (NHANES) data are available at <https://www.cdc.gov/nchs/nhanes/>

**When available:** beginning date: 07-01-2022

### Supporting Documents

**Document types:** None

### Additional Information

**Who can access the data:** anyone requesting the data

**Types of analyses:** for any purpose

**Mechanisms of data availability:** without investigator support.
